# Supplementary material
Source: Royal Society of Chemistry journal article supplement (doi:10.1039/d6cc02558g)
Supplement: d6cc02558g1.pdf [file d6cc02558g1.pdf]

## **Electronic Supplementary Information**

### **Tuning the Interlocking in Partially Saturated Copper(I) Rotaxane Complexes for O<sub>2</sub>-to-H<sub>2</sub>O Electrocatalytic Reduction**

Yan Zhang,<sup>†a</sup> Hei Tung Yau,<sup>†ab</sup> Qi-Fa Chen,<sup>ac</sup> Yulin Deng,<sup>ac</sup> Zhuoliang Ying,<sup>a</sup> Seungkyu Lee,<sup>\*a</sup> Ho Yu Au-Yeung<sup>\*ac</sup> and Edmund C. M. Tse<sup>\*abd</sup>

<sup>a</sup> Department of Chemistry, The University of Hong Kong, Hong Kong SAR, China

<sup>b</sup> HKU-CAS Joint Laboratory on New Materials, The University of Hong Kong, Hong Kong SAR, China

<sup>c</sup> State Key Laboratory of Synthetic Chemistry, The University of Hong Kong, Hong Kong SAR, China

<sup>d</sup> HKU Shenzhen Institute of Research and Innovation (HKU-SIRI), Shenzhen 518057, China

<sup>†</sup> These authors contributed equally: Hei Tung Yau and Yan Zhang

\* Corresponding authors: SL ([skchem@hku.hk](mailto:skchem@hku.hk)); HYA ([hoyuay@hku.hk](mailto:hoyuay@hku.hk)); ECMT ([ecmtse@hku.hk](mailto:ecmtse@hku.hk))

#### **List of Contents**

1. Syntheses and Characterisations
2. Electrochemical Measurements
3. Supplementary References

## 1. Molecular Syntheses and Characterisations.

### 1.1 Syntheses.

*General.* All reagents (purity  $\geq 98\%$  unless otherwise noted) were purchased from commercial suppliers (J&K, Sigma-Aldrich, TCI, Aladdin, Energy, Macklin, and Dkmchem) and used without further purification unless otherwise noted. All the solvents were of analytical grade (ACI Labscan and DUKSAN Pure Chemicals). Deuterated solvents  $\text{CDCl}_3$  and  $\text{CD}_3\text{CN}$  were purchased from Cambridge Isotope Laboratories (CIL) ( $\geq 99.8$  atom% D). Compounds **1**, **3**, **5**, **M4**, **M6**, **M8**, and **M10** were synthesized according to literature procedures.<sup>1-3</sup> Thin layer chromatography (TLC) was performed on silica gel 60 F254 (Merck, Germany, Aluminium sheet) and column chromatography was carried out using silica gel F60 (Silicycle, Canada). HR-ESI-MS were obtained from a Bruker Impact II Ultra-High Resolution QTOF mass spectrometer. NMR spectra were recorded on Bruker DPX spectrometers with working frequencies at 400 MHz, 500 MHz, or 600 MHz for  $^1\text{H}$ , and 101 MHz, 126 MHz, or 151 MHz for  $^{13}\text{C}$ , respectively. Chemical shifts were reported in ppm and referenced to solvent residues (for  $^1\text{H}$ :  $\text{CDCl}_3$ :  $\delta = 7.26$  ppm,  $\text{CD}_3\text{CN}$ :  $\delta = 1.94$  ppm; for  $^{13}\text{C}$ :  $\text{CDCl}_3$ :  $\delta = 77.16$  ppm,  $\text{CD}_3\text{CN}$ :  $\delta = 1.32$  ppm and 118.26 ppm).

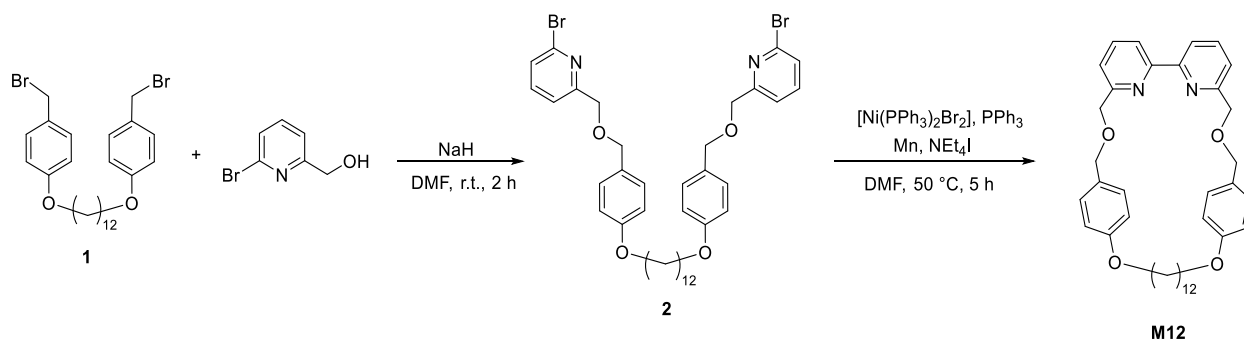

### Scheme S1. Synthesis of **M12**.

*Synthesis of 2.* To a solution of 2-bromo-6-pyridinemethanol (432 mg, 0.8 mmol) in 10 mL of dimethylformamide (DMF) at 0 °C was added 60 wt% NaH (64 mg, 1.6 mmol) in three portions with continuous stirring. After stirring at 0 °C for 30 minutes, compound **1** (358 mg, 0.7 mmol) was added and the mixture was stirred at 0 °C for 1 hour. The reaction mixture was warmed up to room temperature, and water was added (10 mL) dropwise. The solvents were removed using a rotary evaporator, and the residue was redissolved in  $\text{CH}_2\text{Cl}_2$  (50 mL), washed with water ( $2 \times 10$  mL) and brine (10 mL), dried over  $\text{Na}_2\text{SO}_4$  and filtered. Solvents were removed from the filtrate using a rotary evaporator to afford a yellow oil, which was purified using a silica column (eluent:

CH<sub>2</sub>Cl<sub>2</sub>/hexane, v/v = 1:1) to give **2** as a white solid. Yield = 0.49 g, 65%. <sup>1</sup>H NMR (500 MHz, CDCl<sub>3</sub>, 298 K) δ 7.55 (t, *J* = 8.0 Hz, 2H), 7.46 (d, *J* = 7.5 Hz, 2H), 7.37 (d, *J* = 8.0 Hz, 2H), 7.28 (d, *J* = 8.5 Hz, 4H), 6.88 (d, *J* = 8.5 Hz, 4H), 4.62 (s, 4H), 4.56 (s, 4H), 3.95 (t, *J* = 7.0 Hz, 4H), 1.77 (p, *J* = 7.0 Hz, 4H), 1.45 (p, *J* = 7.8 Hz, 4H), 1.36–1.23 (m, 12H). <sup>13</sup>C {<sup>1</sup>H} NMR (126 MHz, CDCl<sub>3</sub>, 298 K) δ 159.0, 141.4, 139.1, 129.7, 126.7, 120.1, 114.6, 73.0, 72.1, 68.2, 29.7, 29.5, 29.4, 26.2. HRMS (ESI<sup>+</sup>): *m/z* calcd. for C<sub>38</sub>H<sub>47</sub>N<sub>2</sub>O<sub>4</sub>Br<sub>2</sub> [M+H]<sup>+</sup>: 755.1881, found: 755.1879.

*Synthesis of M12.* Under an argon atmosphere, a mixture of [Ni(PPh<sub>3</sub>)<sub>2</sub>Br<sub>2</sub>] (1.49 g, 2.0 mmol), PPh<sub>3</sub> (1.05 g, 4.0 mmol), manganese powder (1.10 g, 20.0 mmol) and NEt<sub>4</sub>I (0.51 g, 2.0 mmol) in DMF (20 mL) was sonicated for 10 minutes, and the mixture was heated at 50 °C for 1 hour. To this mixture was slowly added a solution of compound **2** (1.51 g, 2.0 mmol) in DMF (20 mL) over 4 hours, and the reaction mixture was heated at 50 °C for another 1 hour. The reaction mixture was cooled to room temperature, CH<sub>2</sub>Cl<sub>2</sub> (50 mL) and a saturated solution of Na<sub>2</sub>EDTA in aqueous ammonia (17.5 wt%, 50 mL) were added, the mixture was then filtered through a Celite pad. The filtrate was washed with water (2 × 50 mL) and brine (50 mL), dried over Na<sub>2</sub>SO<sub>4</sub>, and the solvents were removed using a rotary evaporator. The crude product was purified by a silica column with a gradient elution with an increasing amount of CH<sub>3</sub>CN from 0% to 10% in CH<sub>2</sub>Cl<sub>2</sub>/hexane (v/v 1:1). Macrocycle **M12** was obtained as a white solid. Yield = 0.27 g, 54%. <sup>1</sup>H NMR (500 MHz, CD<sub>3</sub>CN, 298 K) δ 8.14 (d, *J* = 7.5 Hz, 2H), 7.81 (t, *J* = 8.0 Hz, 2H), 7.40 (d, *J* = 7.5 Hz, 2H), 7.22 (d, *J* = 8.5 Hz, 4H), 6.79 (d, *J* = 8.5 Hz, 4H), 4.63 (s, 4H), 4.58 (s, 4H), 3.93 (t, *J* = 6.5 Hz, 4H), 1.65 (p, *J* = 7.0 Hz, 4H), 1.37 (p, *J* = 8.0 Hz, 4H), 1.27–1.19 (m, 12H). <sup>13</sup>C {<sup>1</sup>H} NMR (126 MHz, CD<sub>3</sub>CN, 298 K) δ 159.6, 159.3, 156.3, 138.4, 131.4, 130.8, 123.1, 120.4, 115.3, 73.4, 73.0, 68.4, 30.1, 29.9, 29.5, 29.4, 26.3. HRMS (ESI<sup>+</sup>): *m/z* calcd. for C<sub>38</sub>H<sub>47</sub>N<sub>2</sub>O<sub>4</sub> [M+H]<sup>+</sup>: 595.3530, found: 595.3520.

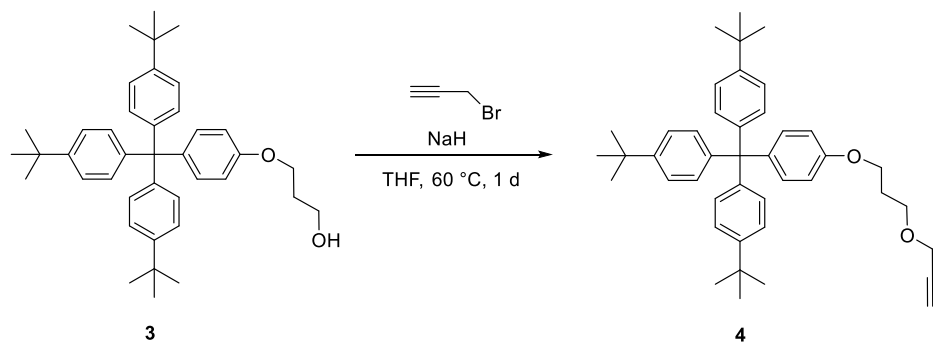

### Scheme S2. Synthesis of **4**.

*Synthesis of 4.* To a solution of compound **3** (456 mg, 0.8 mmol) in THF (10 mL) at 0 °C was added 60 wt% NaH (64 mg, 1.6 mmol) in three portions with continuous stirring. After stirring at 0 °C for 30 minutes, propargyl bromide (0.1 mL, 0.96 mmol) was added, the solution was stirred at 0 °C for 1 hour. The reaction mixture was warmed to room temperature, and subsequently quenched by adding water (10 mL) dropwise. Solvents were removed using a rotary evaporator and the residue was redissolved in CH<sub>2</sub>Cl<sub>2</sub> (50 mL), washed with water (2 × 10 mL) and brine (10 mL). The organic layer was dried over Na<sub>2</sub>SO<sub>4</sub>, filtered, solvents of the filtrate was removed using a rotary evaporator to afford a yellow oil residue, which was purified using a silica column (eluent: CH<sub>2</sub>Cl<sub>2</sub>/hexane, v/v = 1:5) to afford **4** as a pale yellow solid. Yield = 0.35 g, 73%. <sup>1</sup>H NMR (500 MHz, CDCl<sub>3</sub>, 298 K) δ 7.23 (d, *J* = 8.5 Hz, 6H), 7.09–7.07 (m, 8H), 6.77 (d, *J* = 8.5 Hz, 2H), 4.15 (d, *J* = 2.5 Hz, 2H), 4.04 (t, *J* = 6.5 Hz, 2H), 3.70 (t, *J* = 6.0 Hz, 2H), 2.39 (t, *J* = 2.5 Hz, 1H), 2.06 (p, *J* = 6.0 Hz, 2H), 1.30 (s, 27H). <sup>13</sup>C {<sup>1</sup>H} NMR (126 MHz, CDCl<sub>3</sub>, 298 K) δ 156.8, 148.4, 144.3, 139.7, 132.4, 130.8, 124.2, 113.2, 80.0, 74.4, 66.9, 64.7, 63.2, 58.4, 34.4, 31.5, 29.8. HRMS (ESI+): *m/z* calcd. for C<sub>43</sub>H<sub>53</sub>O<sub>2</sub> [M+H]<sup>+</sup>: 601.4040, found: 601.4043.

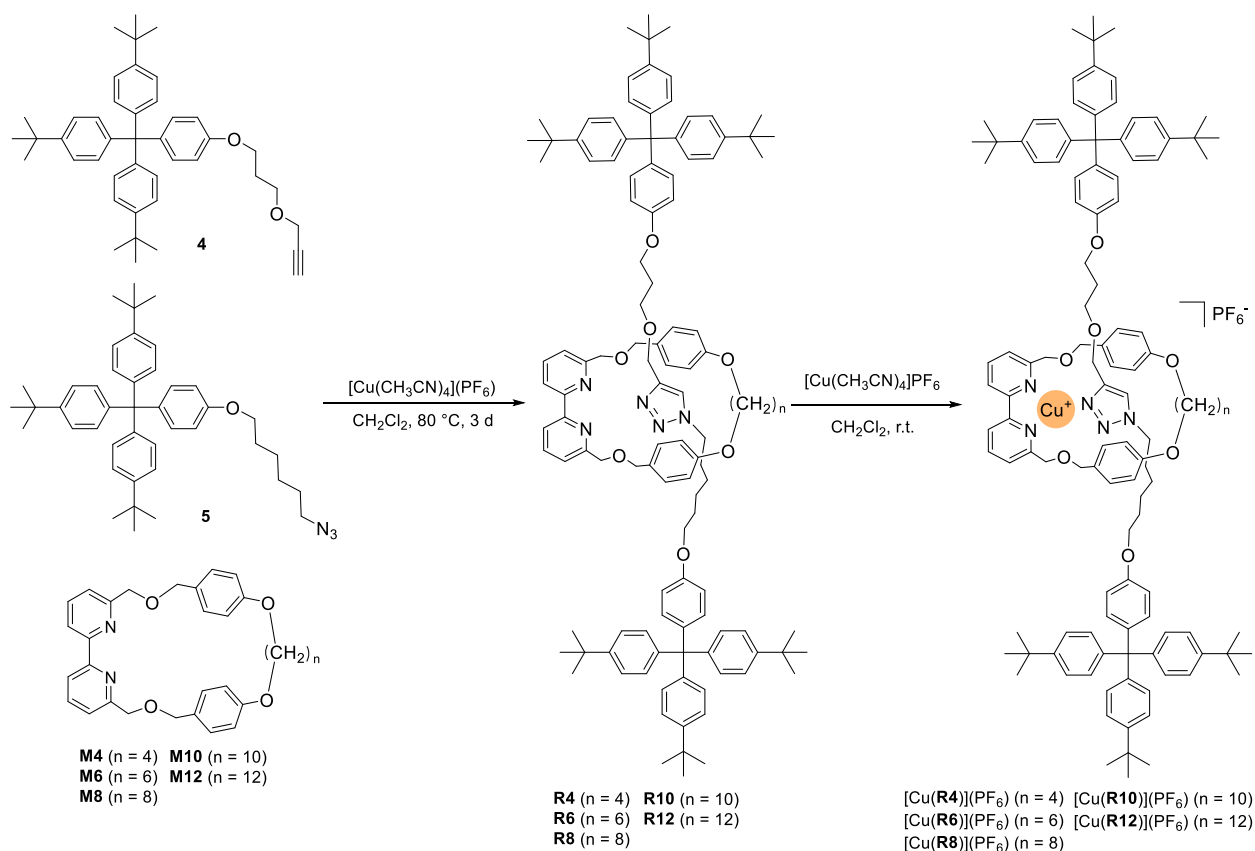

**Scheme S3.** Active template synthesis of the rotaxane ligands and Cu<sup>I</sup> complexes.

**General procedures for the synthesis of [2]rotaxane ligands and the Cu<sup>I</sup> complexes.** Under an argon atmosphere, a mixture of the macrocycle (25 μmol) and [Cu(MeCN)<sub>4</sub>](PF<sub>6</sub>) (9.3 mg, 25 μmol) in CH<sub>2</sub>Cl<sub>2</sub> (1 mL) was stirred at room temperature for 30 minutes to give an orange colour solution, and then a mixture of **3** (45.1 mg, 75 μmol) and **5** (47.2 mg, 75 μmol) in CH<sub>2</sub>Cl<sub>2</sub> (1.5 mL) was added and heated at 80 °C for 3 days. The reaction mixture was cooled to room temperature, diluted with CH<sub>2</sub>Cl<sub>2</sub> (50 mL), and washed with a saturated solution of Na<sub>2</sub>EDTA in aqueous ammonia (17.5 wt%, 50 mL). The organic layer was collected and the aqueous phase was extracted with CH<sub>2</sub>Cl<sub>2</sub> (3 × 10 mL). The organic phases were combined and dried over Na<sub>2</sub>SO<sub>4</sub>, filtered, and solvents from the filtrate were removed using a rotary evaporator. The crude product was purified using a silica column (gradient elution: from v/v = 1:1 CH<sub>2</sub>Cl<sub>2</sub>/hexane to v/v/v = 2:2:1 CH<sub>2</sub>Cl<sub>2</sub>/hexane/MeCN) to give the [2]rotaxanes.

To obtain the Cu<sup>I</sup> complexes, an equimolar mixture of the rotaxane ligand (10 μmol) and [Cu(MeCN)<sub>4</sub>](PF<sub>6</sub>) (10 μmol) in CH<sub>2</sub>Cl<sub>2</sub> (10 mL) was stirred at room temperature for 1 hour under

an argon atmosphere. The reaction mixture was then filtered through a Celite pad, and solvents in the filtrate were removed using a rotary evaporator to give the Cu<sup>I</sup> rotaxane complexes (as hexafluorophosphate salts) as a red solid.

**R4**: White solid, yield = 31 mg, 74%. <sup>1</sup>H NMR (600 MHz, *v/v* = 1:2 CDCl<sub>3</sub>/CD<sub>3</sub>CN, 298 K) δ 7.74 (s, 1H), 7.62 (t, *J* = 7.8 Hz, 2H), 7.46 (d, *J* = 7.8, 2H), 7.35 (d, *J* = 7.8 Hz, 2H), 7.32–7.25 (m, 12H), 7.16 (d, *J* = 8.4 Hz, 6H), 7.11 (d, *J* = 9.0 Hz, 6H), 7.04 (d, *J* = 9.0 Hz, 2H), 6.99 (d, *J* = 9.0 Hz, 2H), 6.96 (d, *J* = 8.4 Hz, 4H), 6.63–6.60 (m, 8H), 4.47 (d, *J* = 12.0 Hz, 2H), 4.41 (d, *J* = 11.4 Hz, 2H), 4.39 (s, 2H), 4.24 (d, *J* = 12.6 Hz, 2H), 4.21 (d, *J* = 12.6 Hz, 2H), 4.05–4.00 (m, 2H), 3.97–3.92 (m, 2H), 3.81 (t, *J* = 6.6 Hz, 2H), 3.47 (t, *J* = 6.0 Hz, 2H), 3.40 (t, *J* = 6.6 Hz, 2H), 3.37 (t, *J* = 7.8 Hz, 2H), 1.85–1.79 (m, 6H), 1.27 (s, 27H), 1.26 (s, 27H), 1.02 (p, *J* = 7.2 Hz, 2H), 0.75 (p, *J* = 7.8 Hz, 2H), 0.59 (p, *J* = 7.8 Hz, 2H), 0.44 (p, *J* = 7.8 Hz, 2H). <sup>13</sup>C {<sup>1</sup>H} NMR (151 MHz, *v/v* = 1:2 CDCl<sub>3</sub>/CD<sub>3</sub>CN, 298 K) δ 159.9, 159.7, 157.8, 157.7, 157.5, 149.4, 145.6, 145.5, 145.0, 140.2, 139.9, 138.2, 132.4, 132.4, 131.3, 131.2, 131.2, 130.7, 130.6, 125.4, 125.4, 124.4, 121.9, 121.9, 115.8, 114.3, 114.2, 73.1, 71.7, 68.1, 67.5, 67.4, 65.7, 65.0, 64.0, 63.9, 50.1, 34.9, 31.5, 30.3, 30.2, 29.8, 29.0, 27.7, 26.2, 25.5, 25.4. IR (cm<sup>-1</sup>): 2955, 2920, 2859, 1607, 1578, 1506, 1457, 1363, 1248, 1182, 1092, 1018, 821, 704, 626, 579. HRMS (ESI<sup>+</sup>): *m/z* calcd. for C<sub>116</sub>H<sub>138</sub>N<sub>5</sub>O<sub>7</sub> [M+H]<sup>+</sup>: 1714.0624, found: 1714.0601.

[Cu(**R4**)](PF<sub>6</sub>): Orange solid, yield = 18 mg, 93%. <sup>1</sup>H NMR (600 MHz, CD<sub>3</sub>CN, 298 K) δ 7.82 (br, 4H), 7.59 (br, 2H), 7.48 (s, 1H), 7.31 (d, *J* = 6.6 Hz, 6H), 7.28 (d, *J* = 8.4 Hz, 6H), 7.19 (d, *J* = 8.4 Hz, 6H), 7.12 (d, *J* = 9.0 Hz, 6H), 7.07 (d, *J* = 9.0 Hz, 2H), 7.03 (d, *J* = 8.4 Hz, 2H), 6.93 (d, *J* = 7.8 Hz, 4H), 6.77–6.74 (m, 6H), 6.31 (d, *J* = 8.4 Hz, 2H), 4.66 (br, 2H), 4.38 (t, *J* = 7.2 Hz, 2H), 4.25–4.13 (m, 6H), 4.07–4.04 (m, 4H), 3.95 (t, *J* = 6.6 Hz, 2H), 3.25 (br, 2H), 3.02 (br, 2H), 2.77 (br, 2H), 2.03–1.95 (m, 6H), 1.78 (p, *J* = 6.6 Hz, 2H), 1.55 (p, *J* = 7.2 Hz, 2H), 1.40 (p, *J* = 3.0 Hz, 2H), 1.26 (d, *J* = 1.8 Hz, 54H), 1.14–1.11 (m, 2H). <sup>13</sup>C {<sup>1</sup>H} NMR (151 MHz, CD<sub>3</sub>CN, 298 K) δ 159.8, 157.8, 157.0, 149.4, 149.4, 145.6, 145.5, 140.6, 140.5, 140.3, 132.6, 132.4, 131.1, 130.7, 125.5, 125.4, 116.0, 114.2, 113.8, 72.8, 71.3, 68.4, 67.8, 64.5, 64.0, 63.9, 34.9, 34.9, 31.5, 30.4, 30.3, 29.7, 27.7, 26.8, 26.0, 25.7. IR (cm<sup>-1</sup>): 2958, 2928, 2864, 1606, 1578, 1505, 1467, 1393, 1363, 1300, 1245, 1174, 1080, 1016, 839, 819, 703, 624, 583, 556. HRMS (ESI<sup>+</sup>): *m/z* calcd. for C<sub>116</sub>H<sub>137</sub>N<sub>5</sub>O<sub>7</sub>Cu [M-PF<sub>6</sub>]<sup>+</sup>: 1775.9842, found: 1775.9812.

**R6:** White solid, yield = 31 mg, 71%.  $^1\text{H}$  NMR (600 MHz,  $\nu/\nu = 1:2$   $\text{CDCl}_3/\text{CD}_3\text{CN}$ , 298 K)  $\delta$  7.64 (d,  $J = 7.8$  Hz, 2H), 7.59 (t,  $J = 7.8$  Hz, 2H), 7.55 (s, 1H), 7.37 (d,  $J = 7.8$  Hz, 2H), 7.27–7.21 (m, 12H), 7.13 (d,  $J = 9.0$  Hz, 6H), 7.09 (d,  $J = 8.4$  Hz, 6H), 7.01 (d,  $J = 8.4$  Hz, 2H), 6.97–6.93 (m, 6H), 6.55 (d,  $J = 9.0$  Hz, 4H), 6.51–6.45 (m, 4H), 4.47 (s, 4H), 4.37 (s, 6H), 3.79 (t,  $J = 6.6$  Hz, 4H), 3.74 (t,  $J = 6.6$  Hz, 2H), 3.59 (t,  $J = 7.8$  Hz, 2H), 3.43 (t,  $J = 6.0$  Hz, 2H), 3.38 (t,  $J = 6.6$  Hz, 2H), 1.80 (p,  $J = 6.6$  Hz, 2H), 1.58 (p,  $J = 6.6$  Hz, 4H), 1.31–1.28 (m, 4H), 1.26 (d,  $J = 3.0$  Hz, 54H), 1.09 (p,  $J = 6.6$  Hz, 2H), 1.04 (p,  $J = 7.8$ , 2H), 0.71 (p,  $J = 7.2$  Hz, 2H), 0.57 (p,  $J = 7.8$  Hz, 2H).  $^{13}\text{C}\{^1\text{H}\}$  NMR (151 MHz,  $\nu/\nu = 1:2$   $\text{CDCl}_3/\text{CD}_3\text{CN}$ , 298 K)  $\delta$  159.8, 157.8, 157.7, 149.4, 145.6, 145.4, 140.2, 140.1, 138.3, 132.7, 131.5, 130.8, 125.4, 124.1, 121.8, 121.4, 115.6, 114.3, 114.2, 72.9, 71.9, 68.5, 68.2, 67.8, 65.7, 65.2, 64.1, 64.0, 50.5, 35.1, 32.0, 30.5, 29.8, 29.4, 28.0, 26.6, 26.2, 25.8. IR ( $\text{cm}^{-1}$ ): 2951, 2920, 2854, 1644, 1607 1579, 1507, 1459, 1361, 1244, 1181, 1090, 1016, 821, 786, 703, 624, 579. HRMS (ESI+):  $m/z$  calcd. for  $\text{C}_{118}\text{H}_{142}\text{N}_5\text{O}_7$   $[\text{M}+\text{H}]^+$ : 1742.0937, found: 1742.0916.

**[Cu(R6)](PF<sub>6</sub>):** Orange solid, yield = 18 mg, 92%.  $^1\text{H}$  NMR (600 MHz,  $\text{CD}_3\text{CN}$ , 298 K)  $\delta$  8.04 (d,  $J = 8.4$  Hz, 2H), 7.96 (t,  $J = 7.8$  Hz, 2H), 7.68 (d,  $J = 7.8$  Hz, 2H), 7.29–7.27 (m, 12H), 7.15–7.13 (m, 12H), 7.10 (d,  $J = 9.0$  Hz, 2H), 7.07 (d,  $J = 9.0$  Hz, 2H), 7.05 (s, 1H), 6.88 (d,  $J = 8.4$  Hz, 4H), 6.77 (d,  $J = 9.0$  Hz, 2H), 6.64–6.61 (m, 6H), 4.52 (d,  $J = 12.6$  Hz, 2H), 4.37 (d,  $J = 12.6$  Hz, 2H), 4.34–4.28 (m, 4H), 4.11 (t,  $J = 7.2$  Hz, 2H), 3.95–3.90 (m, 6H), 3.72 (t,  $J = 6.0$  Hz, 2H), 3.61 (t,  $J = 6.0$  Hz, 2H), 3.19 (t,  $J = 6.0$  Hz, 2H), 1.77–1.74 (m, 6H), 1.72–1.69 (m, 2H), 1.63 (t,  $J = 6.0$  Hz, 2H), 1.57–1.52 (m, 4H), 1.45 (p,  $J = 7.8$  Hz, 2H) 1.26 (d,  $J = 2.6$  Hz, 54H), 1.24–1.22 (m, 2H).  $^{13}\text{C}\{^1\text{H}\}$  NMR (151 MHz,  $\text{CD}_3\text{CN}$ , 298 K)  $\delta$  159.4, 158.9, 157.8, 157.5, 149.4, 149.4 145.5, 145.2, 140.5, 140.4, 140.2, 132.6, 132.5, 131.1, 130.1, 130.0, 125.4, 124.2, 123.4, 121.4, 115.2, 114.3, 114.2, 72.3, 70.7, 68.4, 68.2, 68.0, 65.0, 64.2, 63.9, 51.5, 34.9, 31.5, 30.4, 30.3, 29.9, 29.8, 29.6, 26.7, 26.3, 26.0. IR ( $\text{cm}^{-1}$ ): 2956, 2927, 2864, 1609, 1576, 1505, 1467, 1394, 1361, 1244, 1173, 1105, 1083, 1016, 839, 821, 791, 705, 624, 583, 556, 528. HRMS (ESI+):  $m/z$  calcd. for  $\text{C}_{118}\text{H}_{141}\text{N}_5\text{O}_7\text{Cu}$   $[\text{M}-\text{PF}_6]^+$ : 1805.0159, found: 1805.0133.

**R8:** White solid, yield = 35 mg, 79%.  $^1\text{H}$  NMR (600 MHz,  $\nu/\nu = 1:2$   $\text{CDCl}_3/\text{CD}_3\text{CN}$ , 298 K)  $\delta$  7.85 (d,  $J = 7.8$  Hz, 2H), 7.56 (t,  $J = 7.8$  Hz, 2H), 7.42 (s, 1H), 7.35 (d,  $J = 7.2$  Hz, 2H), 7.26–7.23 (m, 12H), 7.13–7.07 (m, 12H), 6.98–6.95 (m, 6H), 6.91 (d,  $J = 9.0$  Hz, 2H), 6.54 (d,  $J = 8.4$  Hz, 4H), 6.41 (d,  $J = 9.0$  Hz, 2H), 6.38 (d,  $J = 9.0$  Hz, 2H), 4.50 (s, 4H), 4.47 (s, 4H), 4.40 (s, 2H),

3.82 (t,  $J = 7.8$  Hz, 2H), 3.74–3.70 (m, 6H), 3.46 (t,  $J = 6.6$  Hz, 2H), 3.38 (t,  $J = 6.0$  Hz, 2H), 1.80 (p,  $J = 6.0$  Hz, 2H), 1.52 (p,  $J = 6.6$  Hz, 4H), 1.33–1.30 (m, 2H), 1.27 (d,  $J = 3.6$  Hz, 54H), 1.21–1.16 (m, 6H), 1.09 (p,  $J = 3.6$  Hz, 4H), 0.88 (m,  $J = 7.8$  Hz, 2H), 0.79 (q,  $J = 8.4$  Hz, 2H).  $^{13}\text{C}\{^1\text{H}\}$  NMR (151 MHz,  $v/v = 1:2$   $\text{CDCl}_3/\text{CD}_3\text{CN}$ , 298 K)  $\delta$  159.6, 157.8, 157.7, 149.3, 145.7, 145.6, 140.2, 140.1, 138.3, 132.7, 131.5, 130.9, 130.7, 125.4, 123.9, 122.3, 120.8, 115.4, 114.2, 72.9, 72.5, 68.4, 68.2, 67.9, 65.6, 65.2, 64.1, 64.0, 50.7, 35.2, 32.0, 30.8, 30.5, 30.1, 29.8, 29.6, 26.8, 26.0. IR ( $\text{cm}^{-1}$ ): 2955, 2930, 2862, 1607, 1576, 1503, 1460, 1440, 1393, 1360, 1298, 1242, 1181, 1105, 1087, 1017, 817, 786, 703, 622, 579, 528. HRMS (ESI<sup>+</sup>):  $m/z$  calcd. for  $\text{C}_{120}\text{H}_{146}\text{N}_5\text{O}_7$   $[\text{M}+\text{H}]^+$ : 1770.1250, found: 1770.1212.

$[\text{Cu}(\mathbf{R8})](\text{PF}_6)$ : Orange solid, yield = 19 mg, 95%.  $^1\text{H}$  NMR (600 MHz,  $\text{CD}_3\text{CN}$ , 298 K)  $\delta$  8.11 (d,  $J = 7.8$  Hz, 2H), 8.00 (t,  $J = 7.8$  Hz, 2H), 7.71 (d,  $J = 7.8$  Hz, 2H), 7.28–7.25 (m, 12H), 7.14–7.08 (m, 17H), 6.90 (d,  $J = 8.4$  Hz, 4H), 6.76 (d,  $J = 9.0$  Hz, 2H), 6.71 (d,  $J = 9.0$  Hz, 2H), 6.59 (d,  $J = 8.4$  Hz, 4H), 4.51–4.37 (m, 8H), 3.97 (t,  $J = 7.2$  Hz, 2H), 3.95–3.81 (m, 10H), 3.22 (t,  $J = 6.0$  Hz, 2H), 1.75–1.71 (m, 2H), 1.69–1.63 (m, 6H), 1.58 (p,  $J = 7.8$  Hz, 2H), 1.50 (q,  $J = 7.8, 6.2$  Hz, 4H), 1.40–1.37 (m, 6H), 1.25 (d,  $J = 3.0$  Hz, 54H), 1.18–1.14 (m, 2H).  $^{13}\text{C}\{^1\text{H}\}$  NMR (151 MHz,  $\text{CD}_3\text{CN}$ , 298 K)  $\delta$  159.5, 158.8, 157.8, 157.6, 151.8, 149.4, 145.8, 145.5, 140.5, 140.4, 140.0, 132.6, 131.2, 130.2, 129.8, 125.4, 124.1, 123.9, 121.4, 115.0, 114.3, 72.2, 70.8, 68.3, 68.3, 67.8, 65.3, 64.0, 63.9, 51.4, 34.9, 31.5, 30.3, 30.1, 29.7, 29.7, 29.5, 26.7, 26.7, 26.0. IR ( $\text{cm}^{-1}$ ): 2955, 2902, 2864, 1607, 1576, 1503, 1465, 1393, 1363, 1244, 1174, 1105, 1082, 1016, 839, 819, 703, 622, 583, 555, 525. HRMS (ESI<sup>+</sup>):  $m/z$  calcd. for  $\text{C}_{120}\text{H}_{145}\text{N}_5\text{O}_7\text{Cu}$   $[\text{M}-\text{PF}_6]^+$ : 1833.0472, found: 1833.0428.

**R10**: White solid, yield = 38 mg, 85%.  $^1\text{H}$  NMR (600 MHz,  $v/v = 1:2$   $\text{CDCl}_3/\text{CD}_3\text{CN}$ , 298 K)  $\delta$  7.98 (d,  $J = 7.8$  Hz, 2H), 7.55 (t,  $J = 7.8$  Hz, 2H), 7.39 (s, 1H), 7.30 (d,  $J = 7.2$  Hz, 2H), 7.26–7.23 (m, 12H), 7.11–7.07 (m, 12H), 6.98–6.93 (m, 8H), 6.52 (d,  $J = 8.4$  Hz, 4H), 6.46 (d,  $J = 9.0$  Hz, 2H), 6.39 (d,  $J = 8.4$  Hz, 2H), 4.51 (d,  $J = 4.8$  Hz, 8H), 4.41 (s, 2H), 3.94 (t,  $J = 7.8$  Hz, 2H), 3.74–3.71 (m, 6H), 3.47 (t,  $J = 6.0$  Hz, 2H), 3.41 (t,  $J = 6.0$  Hz, 2H), 1.81 (p,  $J = 6.0$  Hz, 2H), 1.54 (p,  $J = 6.6$  Hz, 4H), 1.45 (p,  $J = 7.8$  Hz, 2H), 1.27 (d,  $J = 4.2$  Hz, 54H), 1.25–1.20 (m, 6H), 1.13–1.07 (m, 8H), 0.99 (p,  $J = 7.8$  Hz, 2H), 0.94–0.90 (m, 2H).  $^{13}\text{C}\{^1\text{H}\}$  NMR (151 MHz,  $v/v = 1:2$   $\text{CDCl}_3/\text{CD}_3\text{CN}$ , 298 K)  $\delta$  159.6, 159.4, 157.8, 157.7, 156.4, 149.4, 145.7, 140.3, 140.2, 138.4, 132.7, 131.5, 130.8, 125.5, 123.9, 122.8, 120.7, 115.3, 114.2, 73.1, 73.1, 68.6, 68.3, 68.0, 65.7,

65.2, 64.1, 50.8, 35.2, 32.1, 30.9, 30.5, 30.5, 29.9, 29.8, 29.7, 26.9, 26.8, 26.2. IR (cm<sup>-1</sup>): 2953, 2930, 2863, 1609, 1578, 1506, 1461, 1439, 1393, 1363, 1298, 1244, 1182, 1108, 1077, 1018, 821, 788, 706, 626, 581, 530. HRMS (ESI<sup>+</sup>): *m/z* calcd. for C<sub>122</sub>H<sub>150</sub>N<sub>5</sub>O<sub>7</sub> [M+H]<sup>+</sup>: 1798.1563, found: 1798.1538.

[Cu(**R10**)](PF<sub>6</sub>): Orange solid, yield = 19 mg, 93%. <sup>1</sup>H NMR (600 MHz, CD<sub>3</sub>CN, 298 K) δ 8.12 (d, *J* = 7.8 Hz, 2H), 8.01 (t, *J* = 7.8 Hz, 2H), 7.71 (d, *J* = 7.8 Hz, 2H), 7.37 (s, 1H), 7.30–7.24 (m, 12H), 7.16–7.07 (m, 16H), 6.91 (d, *J* = 8.4 Hz, 4H), 6.75 (d, *J* = 9.0 Hz, 2H), 6.68 (d, *J* = 9.0 Hz, 2H), 6.62 (d, *J* = 9.0 Hz, 4H), 4.51–4.42 (m, 8H), 3.97–3.91 (m, 4H), 3.89–3.81 (m, 6H), 3.79 (t, *J* = 6.0 Hz, 2H), 3.19 (t, *J* = 6.0 Hz, 2H), 1.68 (p, *J* = 7.2, 6.6 Hz, 6H), 1.61–1.51 (m, 4H), 1.45 (p, *J* = 7.2 Hz, 4H), 1.36–1.31 (m, 10H), 1.26 (d, *J* = 1.8 Hz, 54H), 1.09 (q, *J* = 7.8 Hz, 2H). <sup>13</sup>C {<sup>1</sup>H} NMR (151 MHz, CD<sub>3</sub>CN, 298 K) δ 159.6, 158.8, 157.8, 157.6, 151.8, 149.4, 145.7, 145.5, 145.5, 140.5, 140.4, 140.0, 132.6, 132.6, 131.2, 130.2, 130.0, 125.4, 124.6, 124.2, 121.5, 114.9, 114.3, 72.4, 71.3, 68.5, 68.3, 67.8, 65.4, 63.9, 63.8, 51.3, 34.9, 31.5, 30.3, 30.3, 30.0, 29.7, 29.6, 29.5, 29.4, 26.6, 26.6, 25.9. IR (cm<sup>-1</sup>): 2956, 2920, 2862, 1647, 1606, 1579, 1497, 1466, 1391, 1362, 1300, 1245, 1175, 1103, 1083, 1019, 840, 822, 703, 625, 579, 554, 528. HRMS (ESI<sup>+</sup>): *m/z* calcd. for C<sub>122</sub>H<sub>149</sub>N<sub>5</sub>O<sub>7</sub>Cu [M-PF<sub>6</sub>]<sup>+</sup>: 1860.0781, found: 1860.0753.

**R12**: White solid, yield = 37 mg, 81%. <sup>1</sup>H NMR (600 MHz, *v/v* = 1:2 CDCl<sub>3</sub>/CD<sub>3</sub>CN, 298 K) δ 8.06 (d, *J* = 7.8 Hz, 2H), 7.60 (t, *J* = 7.8 Hz, 2H), 7.39 (s, 1H), 7.33 (d, *J* = 7.8 Hz, 2H), 7.25–7.22 (m, 12H), 7.12–7.08 (m, 12H), 7.03 (d, *J* = 8.4 Hz, 4H), 6.99–6.96 (m, 4H), 6.58 (d, *J* = 8.4 Hz, 4H), 6.50 (d, *J* = 9.0 Hz, 2H), 6.44 (d, *J* = 8.4 Hz, 2H), 4.53 (s, 4H), 4.50 (s, 4H), 4.39 (s, 2H), 3.97 (t, *J* = 7.8 Hz, 2H), 3.78–3.73 (m, 6H), 3.49–3.46 (m, 4H), 1.81 (p, *J* = 6.0 Hz, 2H), 1.57 (p, *J* = 6.6 Hz, 4H), 1.49 (p, *J* = 7.8 Hz, 2H), 1.33–1.31 (m, 2H), 1.27–1.26 (m, 58H), 1.16–1.14 (m, 12H), 1.07–1.05 (m, 2H), 0.99–0.96 (m, 2H). <sup>13</sup>C NMR (151 MHz, *v/v* = 1:2 CDCl<sub>3</sub>/CD<sub>3</sub>CN, 298 K) δ 159.6, 159.3, 157.8, 157.7, 149.4, 145.6, 145.6, 140.4, 140.2, 132.7, 132.7, 131.5, 131.5, 131.0, 130.9, 130.8, 125.4, 123.8, 123.2, 120.8, 115.4, 114.2, 114.2, 73.0, 72.8, 68.5, 68.3, 67.9, 65.6, 65.1, 64.1, 64.1, 50.8, 35.2, 32.0, 30.9, 30.5, 30.3, 29.8, 29.7, 28.0, 26.9, 26.7, 26.2. IR (cm<sup>-1</sup>): 2957, 2928, 2859, 1609, 1578, 1506, 1471, 1438, 1391, 1361, 1297, 1244, 1174, 1108, 1077, 1018, 821, 788, 704, 624, 579. HRMS (ESI<sup>+</sup>): *m/z* calcd. for C<sub>124</sub>H<sub>154</sub>N<sub>5</sub>O<sub>7</sub> [M+H]<sup>+</sup>: 1826.1876, found: 1826.1859.

[Cu(**R12**)](PF<sub>6</sub>): Orange solid, yield = 19 mg, 92%. <sup>1</sup>H NMR (600 MHz, CD<sub>3</sub>CN, 298 K) δ 8.12 (d, *J* = 8.0 Hz, 2H), 7.99 (t, *J* = 7.9 Hz, 2H), 7.70 (d, *J* = 7.7 Hz, 2H), 7.52 (s, 1H), 7.27 (dd, *J* = 8.7, 1.9 Hz, 12H), 7.15–7.08 (m, 16H), 6.93 (d, *J* = 8.6 Hz, 4H), 6.72 (d, *J* = 8.9 Hz, 2H), 6.64 (dd, *J* = 8.8, 2.0 Hz, 6H), 4.56–4.47 (m, 4H), 4.43 (s, 4H), 3.97 (d, *J* = 6.7 Hz, 4H), 3.86–3.80 (m, 6H), 3.76 (t, *J* = 6.3 Hz, 2H), 3.19 (t, *J* = 6.1 Hz, 2H), 1.67 (q, *J* = 6.5 Hz, 6H), 1.56 (td, *J* = 7.7, 3.0 Hz, 4H), 1.45–1.40 (m, 4H), 1.31 (d, *J* = 7.4 Hz, 14H), 1.26 (d, *J* = 1.1 Hz, 54H), 1.12–1.08 (m, 2H). <sup>13</sup>C{<sup>1</sup>H} NMR (151 MHz, CD<sub>3</sub>CN, 298 K) δ 159.6, 158.8, 149.4, 145.5, 145.5, 139.9, 132.6, 132.6, 131.2, 130.2, 125.4, 115.0, 114.2, 114.2, 72.6, 71.7, 68.6, 68.3, 67.8, 65.4, 63.9, 51.3, 34.9, 31.5, 30.3, 30.0, 29.8, 29.7, 29.6, 29.5, 29.4, 26.6, 26.5, 25.9. IR (cm<sup>-1</sup>): 2953, 2924, 2859, 1609, 1578, 1506, 1465, 1393, 1361, 1300, 1246, 1176, 1103, 1081, 1018, 839, 823, 704, 624, 579, 556, 525. HRMS (ESI<sup>+</sup>): *m/z* calcd. for C<sub>124</sub>H<sub>153</sub>N<sub>5</sub>O<sub>7</sub>Cu [M-PF<sub>6</sub>]<sup>+</sup>: 1889.1100, found: 1889.1059.

## 1.2 NMR Characterisations.

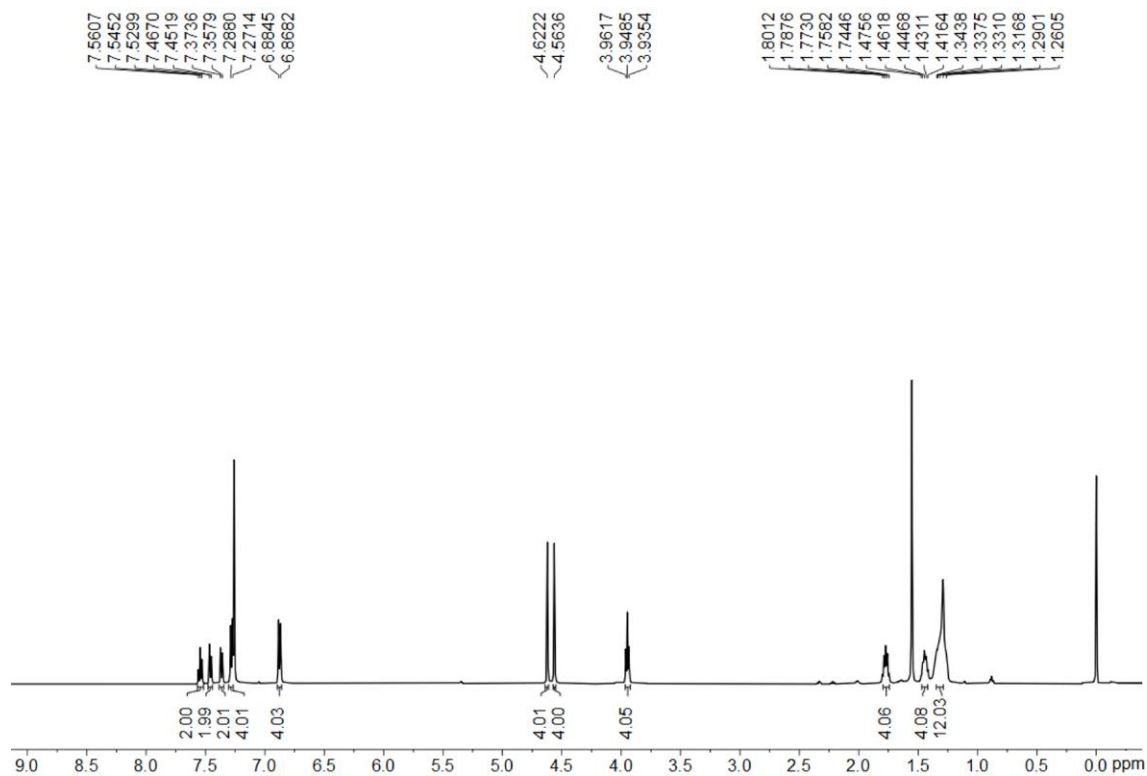

**Fig. S1.**  $^1\text{H}$  NMR (500 MHz,  $\text{CD}_3\text{CN}$ , 298 K) spectrum of **2**.

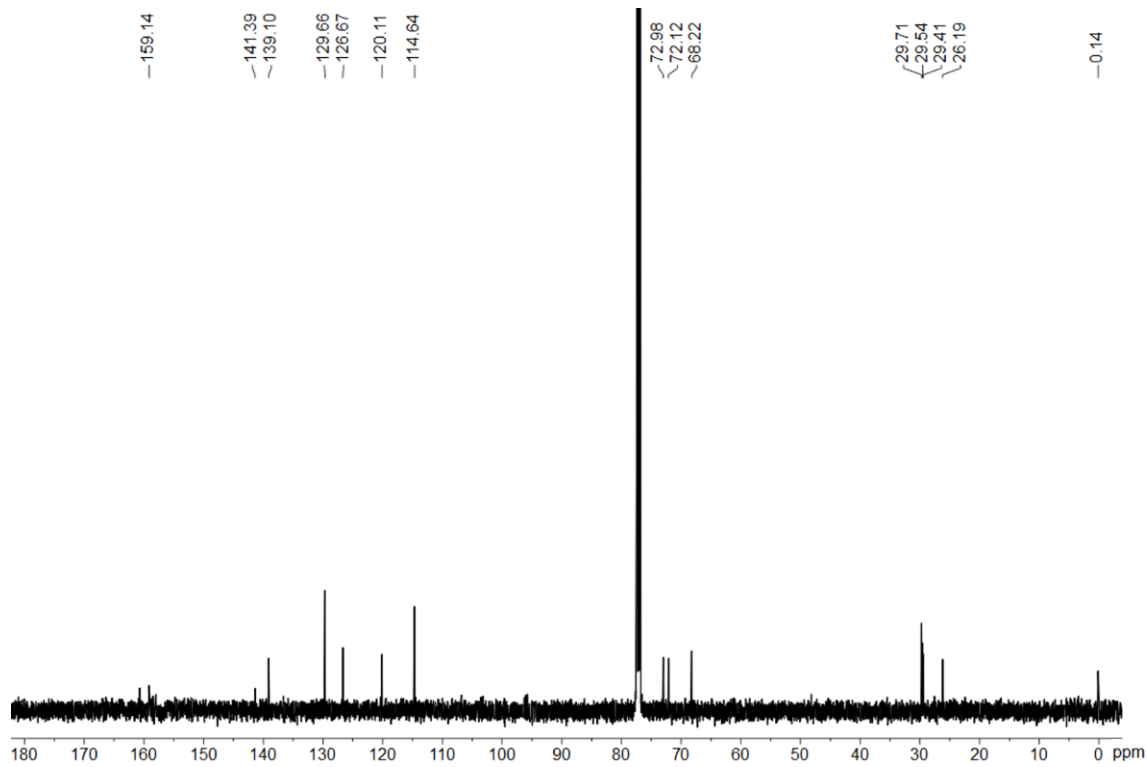

**Fig. S2.**  $^{13}\text{C}\{^1\text{H}\}$  NMR (126 MHz,  $\text{CD}_3\text{CN}$ , 298 K) spectrum of **2**.

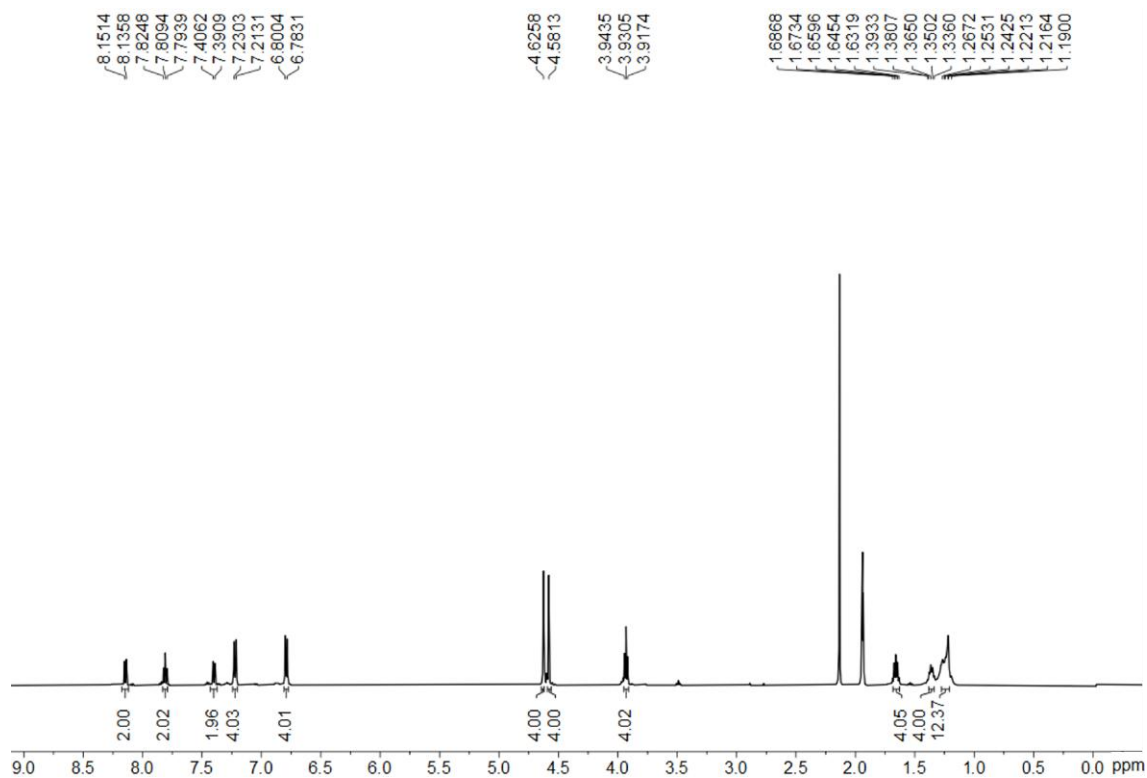

**Fig. S3.**  $^1\text{H}$  NMR (500 MHz,  $\text{CD}_3\text{CN}$ , 298 K) spectrum of **M12**.

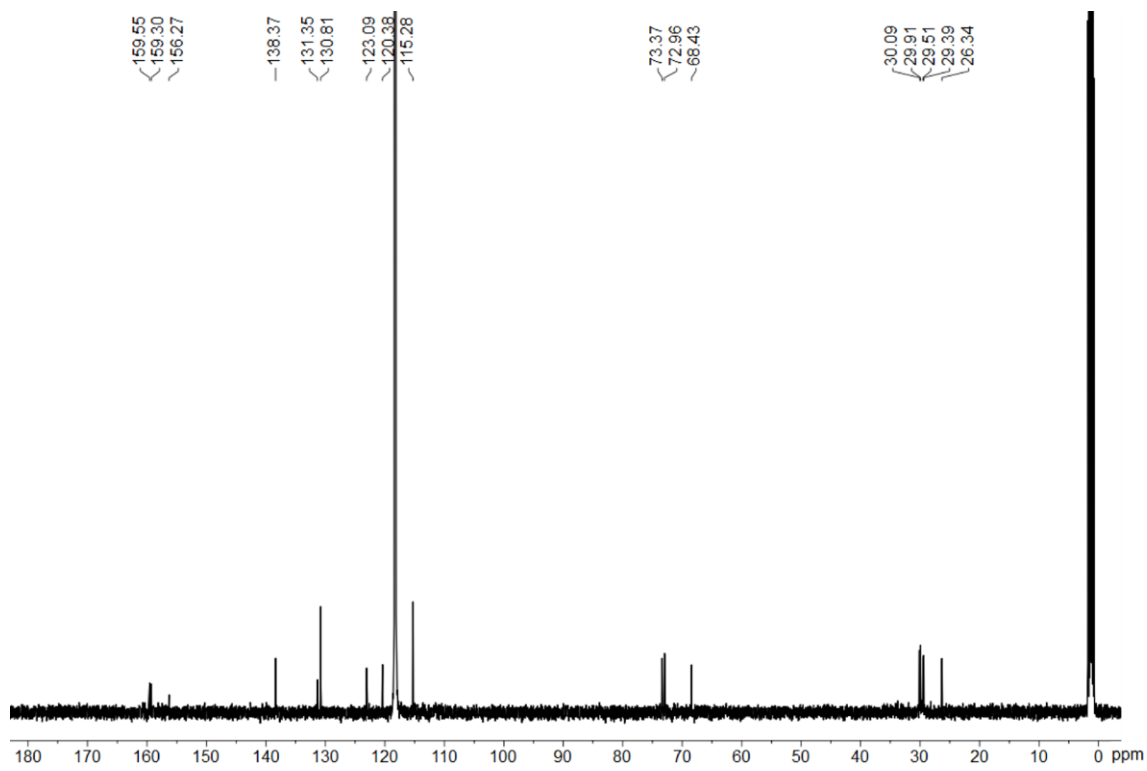

**Fig. S4.**  $^{13}\text{C}\{^1\text{H}\}$  NMR (126 MHz,  $\text{CD}_3\text{CN}$ , 298 K) spectrum of **M12**.

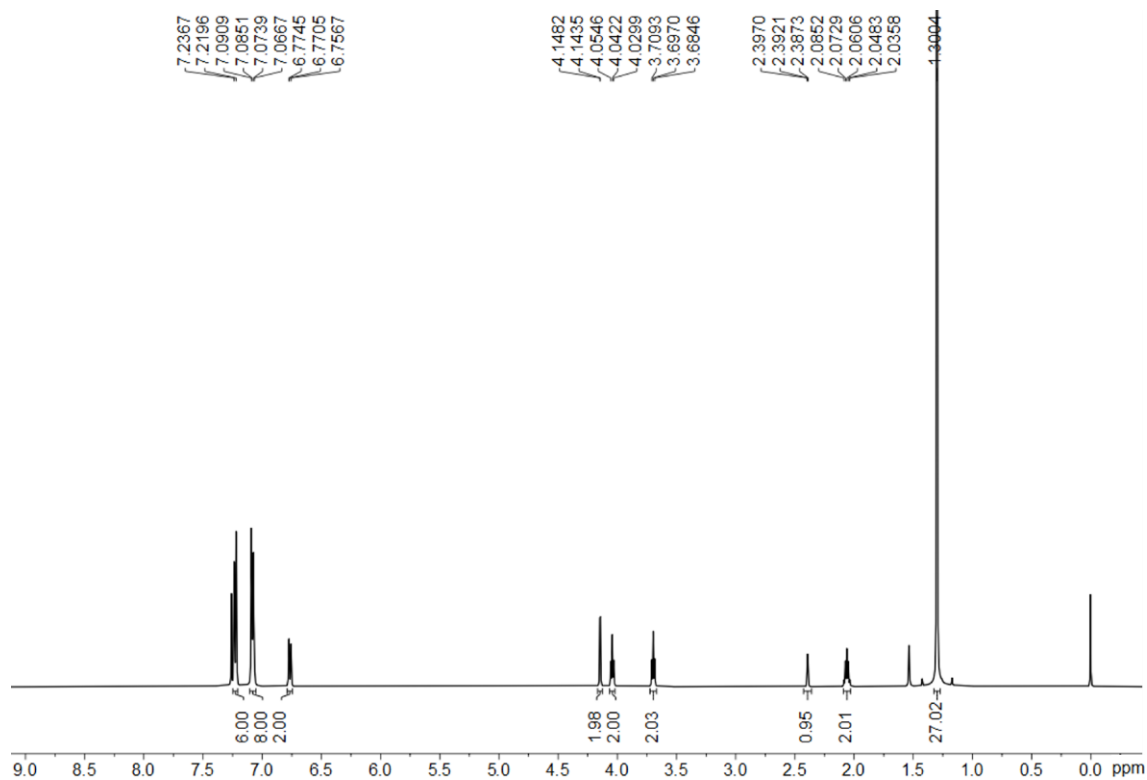

**Fig. S5.**  $^1\text{H}$  NMR (500 MHz,  $\text{CDCl}_3$ , 298 K) spectrum of **4**.

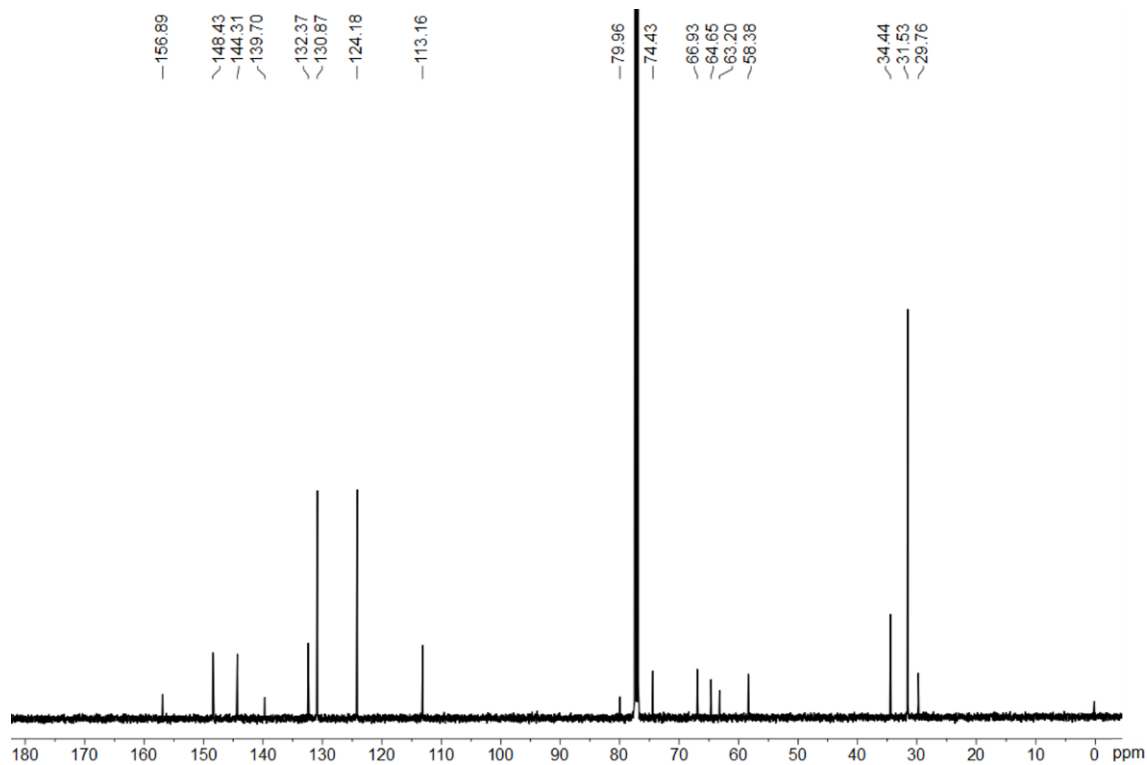

**Fig. S6.**  $^{13}\text{C}\{^1\text{H}\}$  NMR (126 MHz,  $\text{CDCl}_3$ , 298 K) spectrum of **4**.

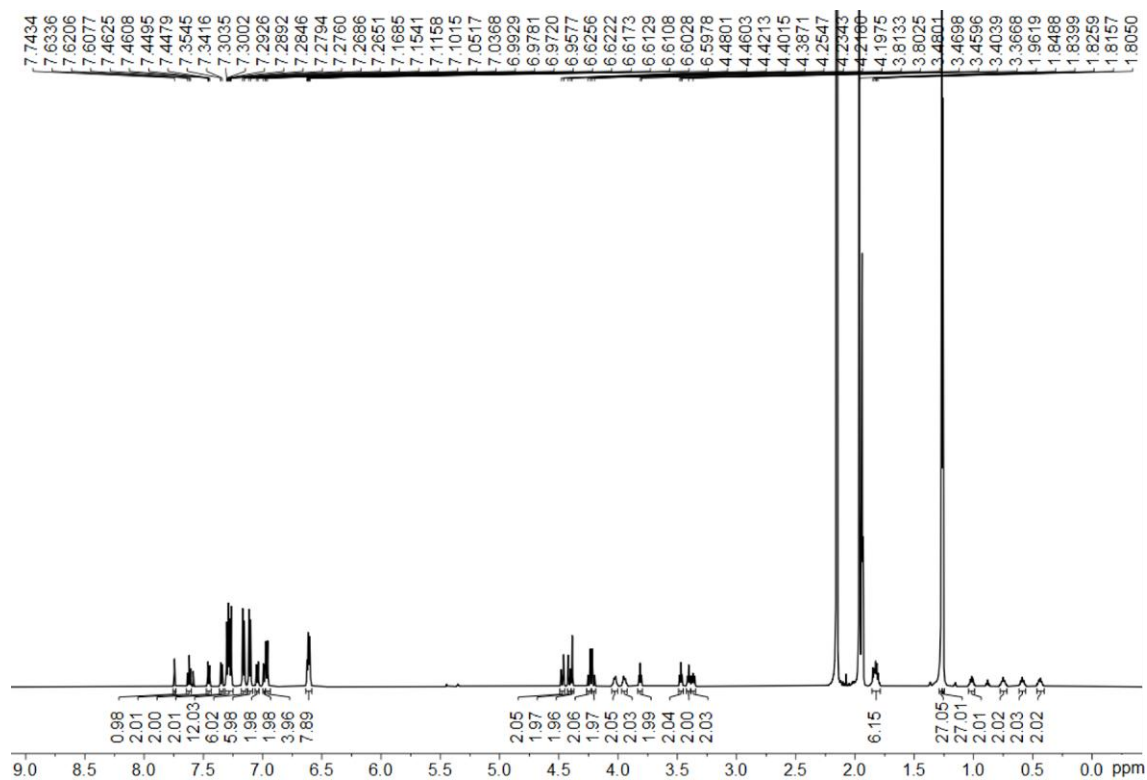

**Fig. S7.**  $^1\text{H}$  NMR (600 MHz,  $v/v = 1:2$   $\text{CDCl}_3/\text{CD}_3\text{CN}$ , 298 K) spectrum of **R4**.

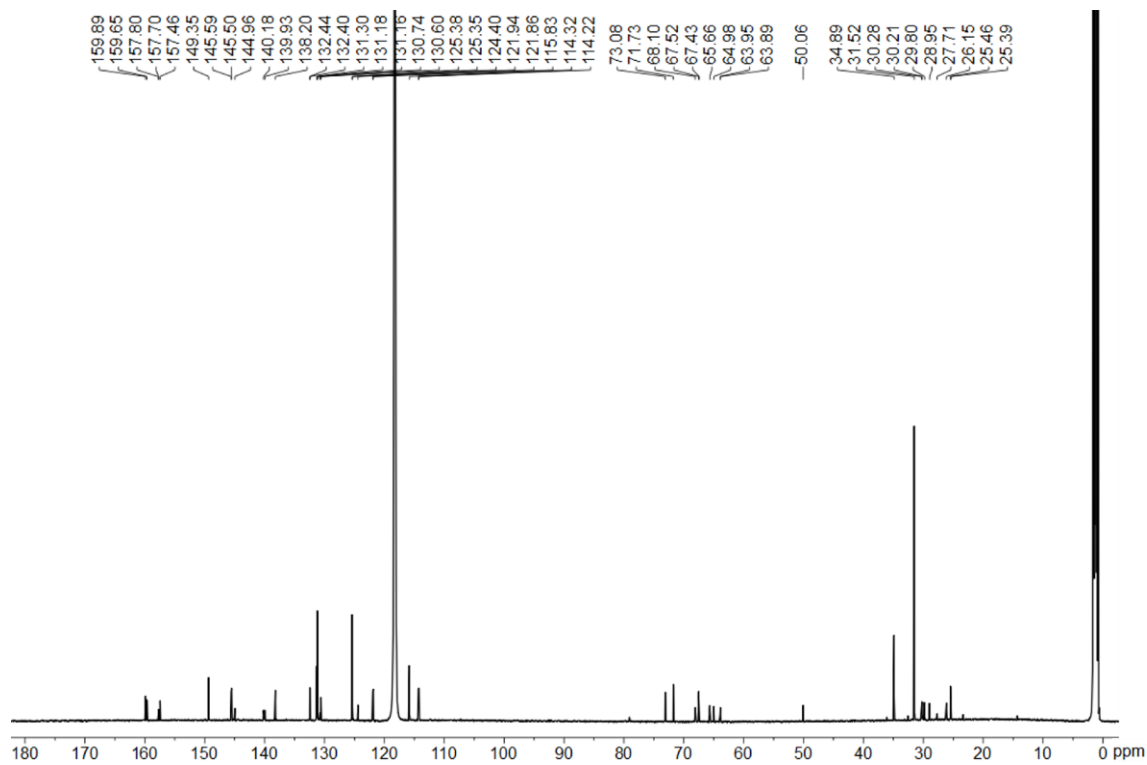

**Fig. S8.**  $^{13}\text{C}\{^1\text{H}\}$  NMR (151 MHz,  $v/v = 1:2$   $\text{CDCl}_3/\text{CD}_3\text{CN}$ , 298 K) spectrum of **R4**.

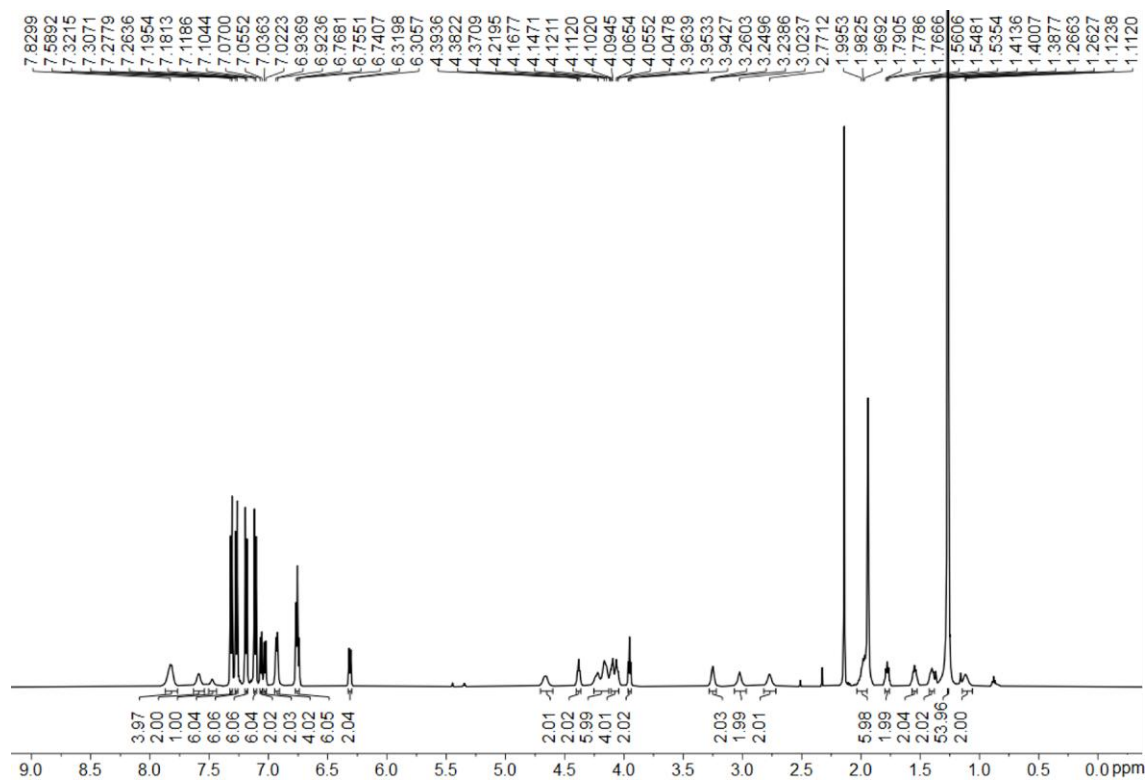

**Fig. S9.**  $^1\text{H}$  NMR (600 MHz,  $\text{CD}_3\text{CN}$ , 298 K) spectrum of  $[\text{Cu}(\mathbf{R4})](\text{PF}_6)$ .

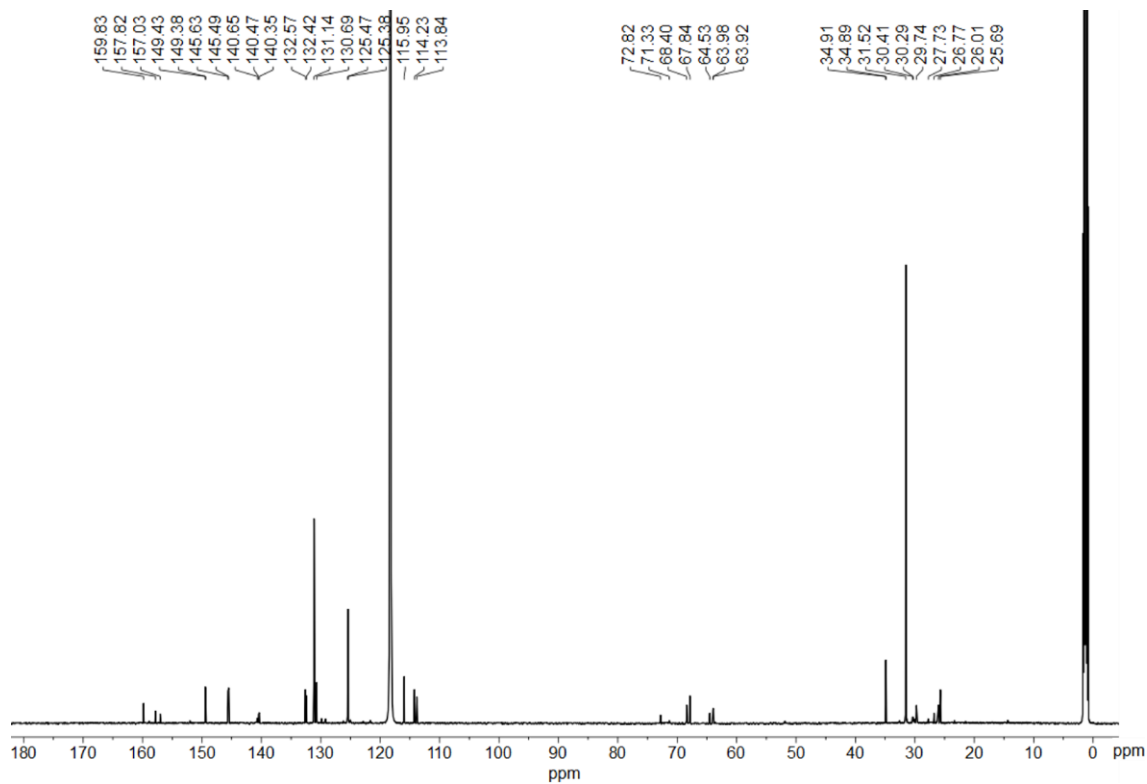

**Fig. S10.**  $^{13}\text{C}\{^1\text{H}\}$  NMR (151 MHz,  $\text{CD}_3\text{CN}$ , 298 K) spectrum of  $[\text{Cu}(\mathbf{R4})](\text{PF}_6)$ .

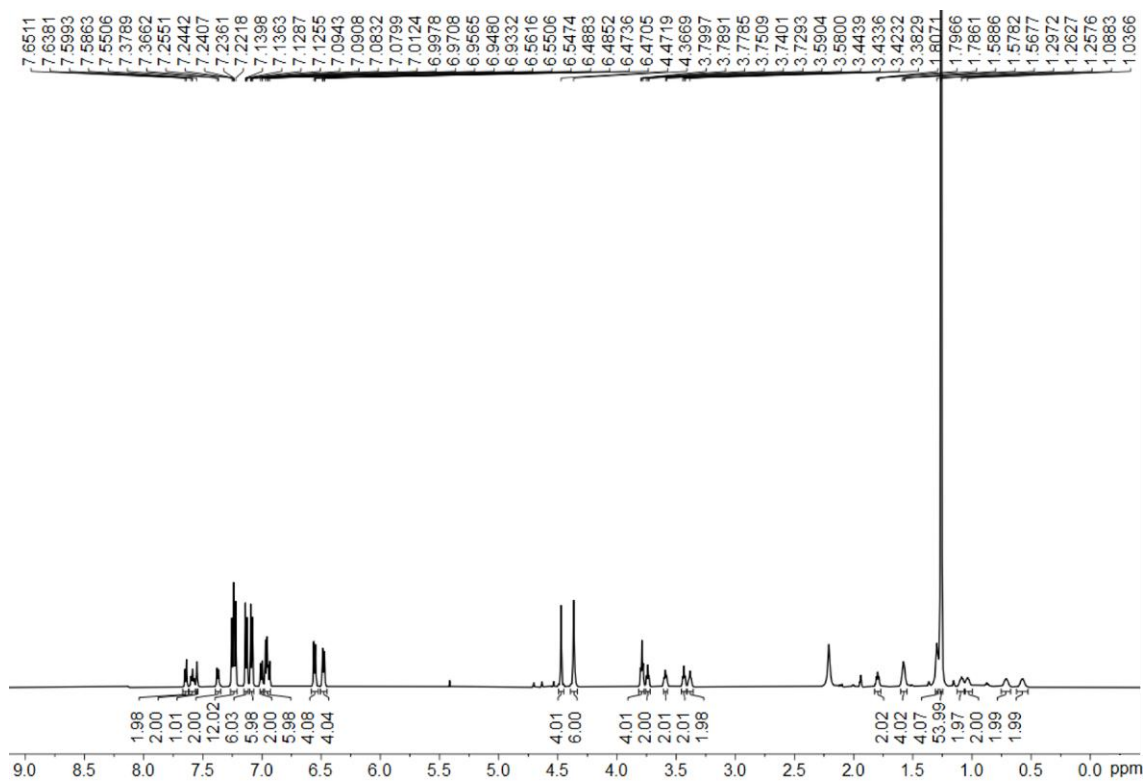

**Fig. S11.**  $^1\text{H}$  NMR (600 MHz,  $v/v = 1:2$   $\text{CDCl}_3/\text{CD}_3\text{CN}$ , 298 K) spectrum of **R6**.

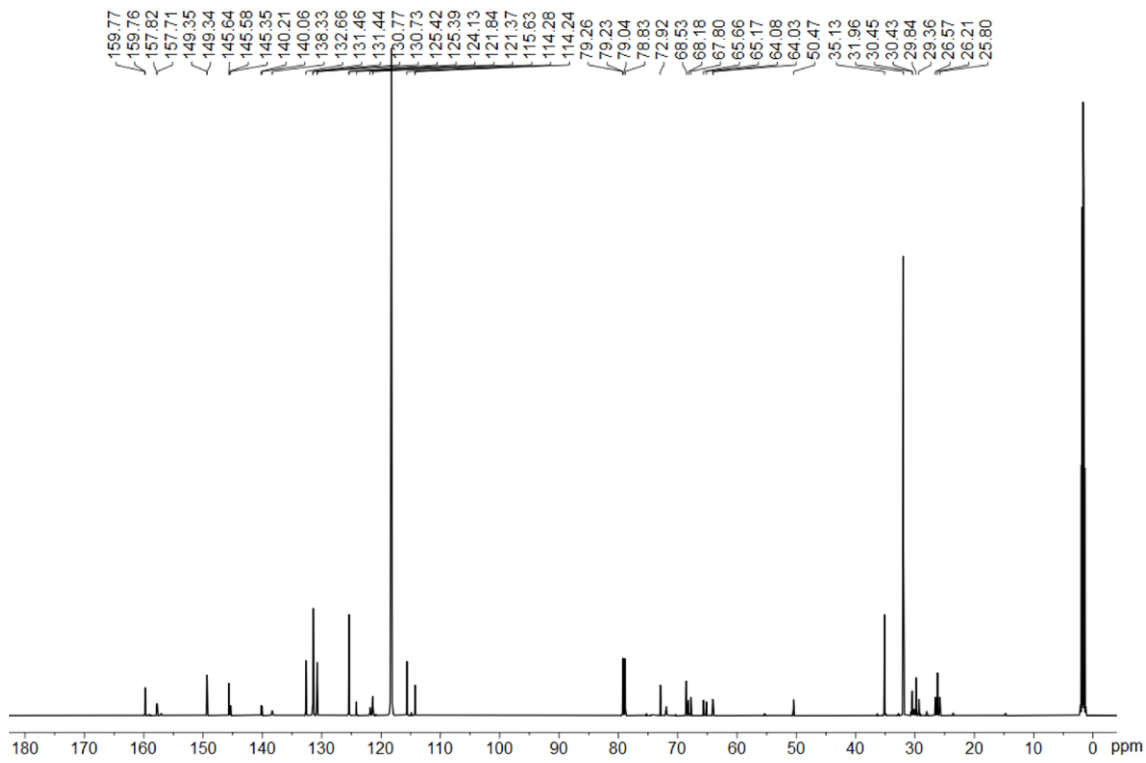

**Fig. S12.**  $^{13}\text{C}\{^1\text{H}\}$  NMR (151 MHz,  $v/v = 1:2$   $\text{CDCl}_3/\text{CD}_3\text{CN}$ , 298 K) spectrum of **R6**.

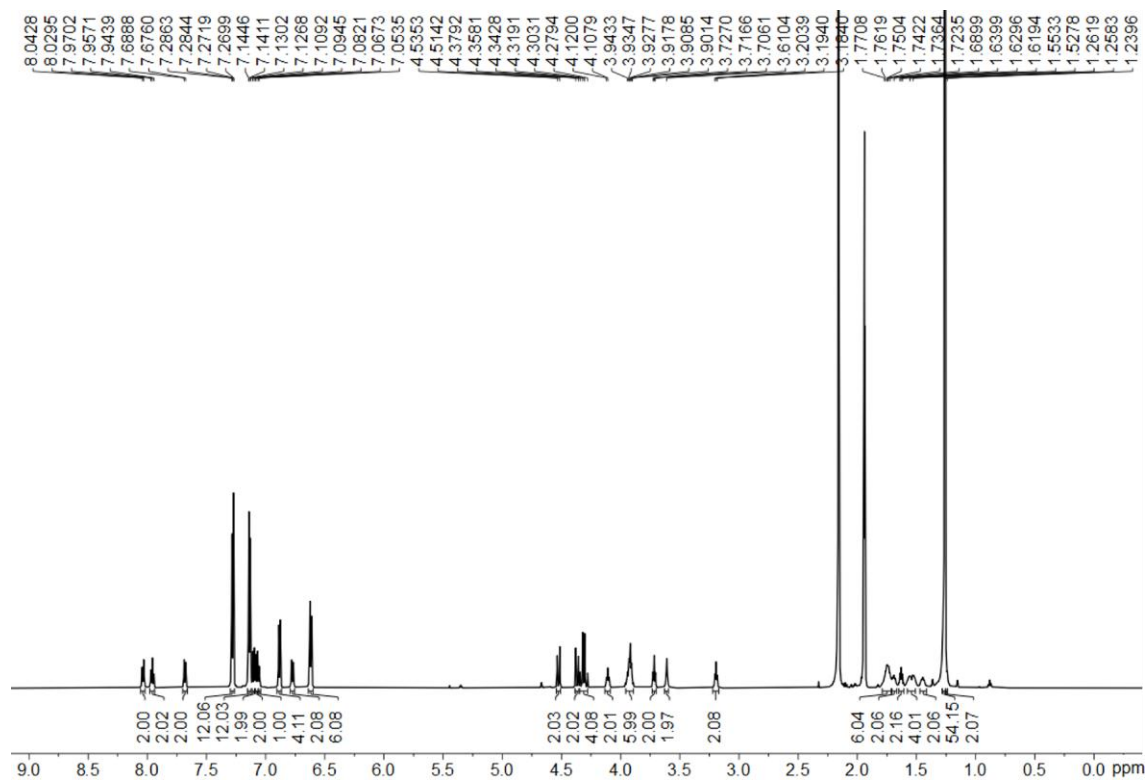

**Fig. S13.**  $^1\text{H}$  NMR (600 MHz,  $\text{CD}_3\text{CN}$ , 298 K) spectrum of  $[\text{Cu}(\text{R6})](\text{PF}_6)$ .

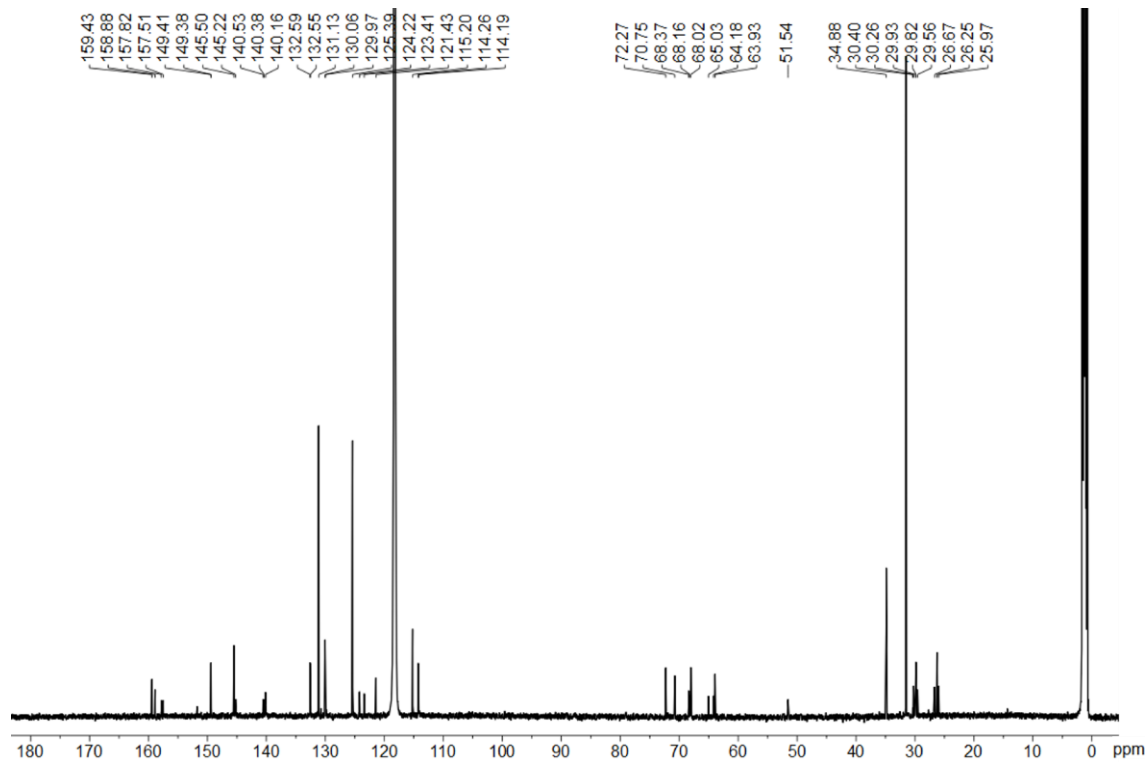

**Fig. S14.**  $^{13}\text{C}\{^1\text{H}\}$  NMR (151 MHz,  $\text{CD}_3\text{CN}$ , 298 K) spectrum of  $[\text{Cu}(\text{R6})](\text{PF}_6)$ .

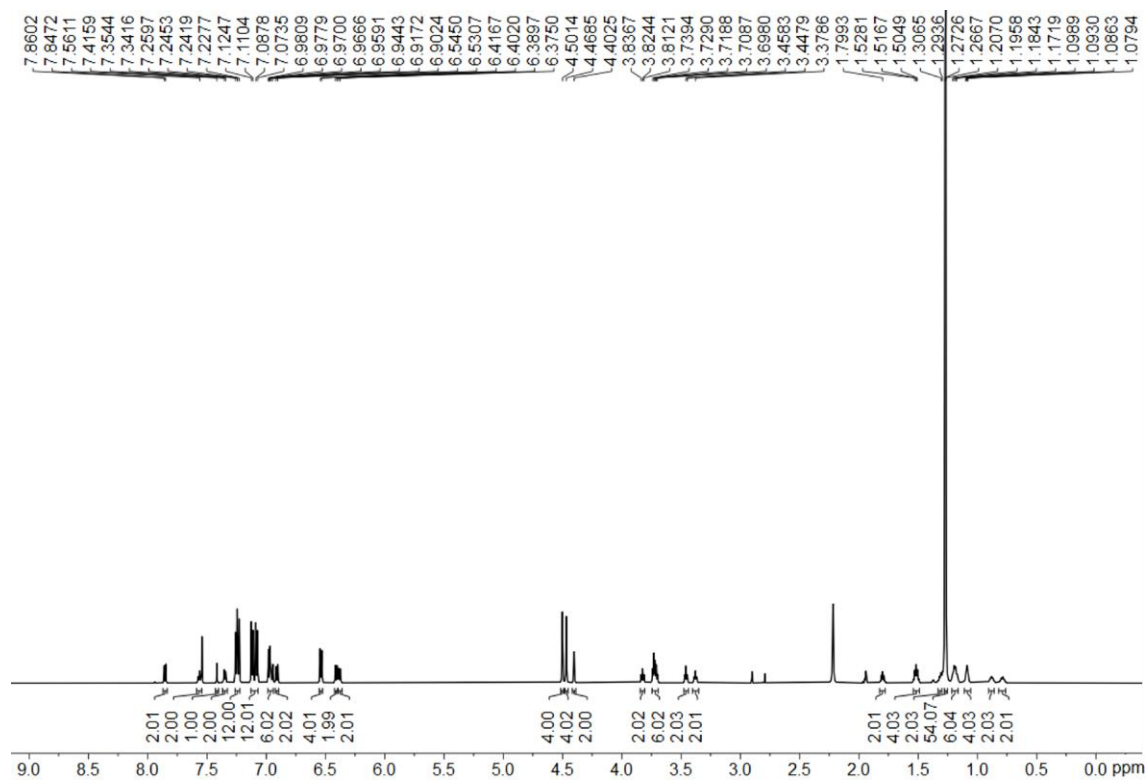

**Fig. S15.**  $^1\text{H}$  NMR (600 MHz,  $v/v = 1:2$   $\text{CDCl}_3/\text{CD}_3\text{CN}$ , 298 K) spectrum of **R8**.

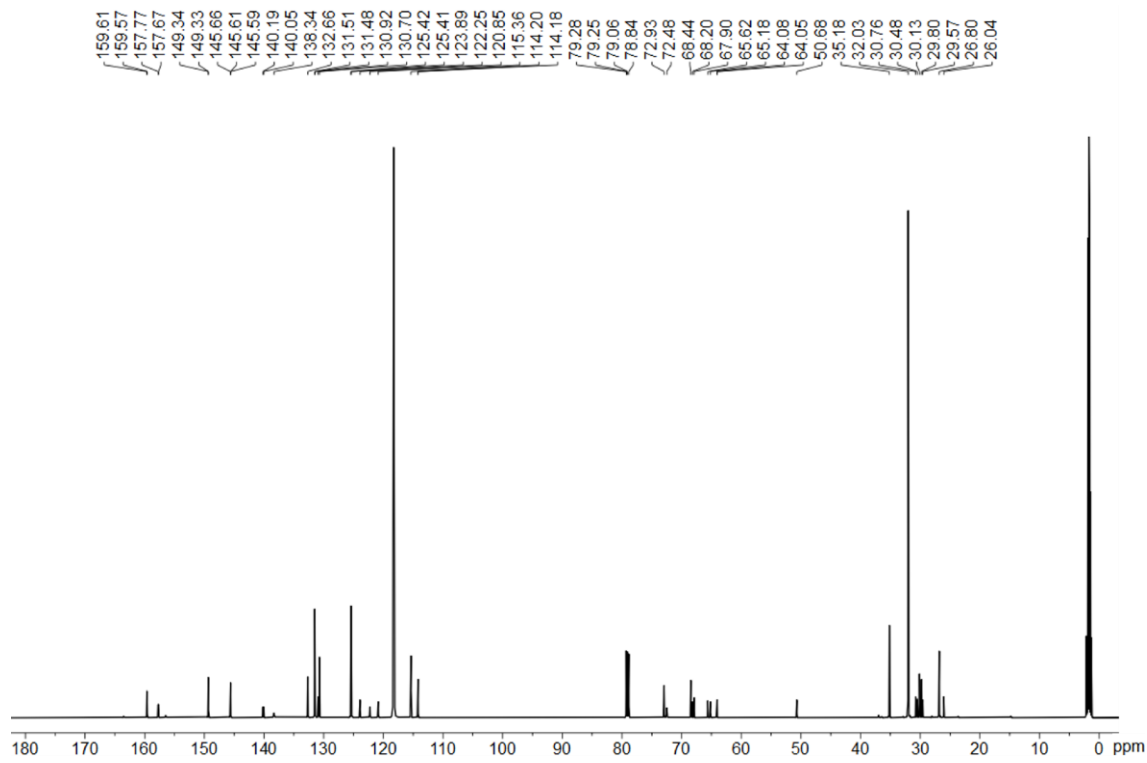

**Fig. S16.**  $^{13}\text{C}\{^1\text{H}\}$  NMR (151 MHz,  $v/v = 1:2$   $\text{CDCl}_3/\text{CD}_3\text{CN}$ , 298 K) spectrum of **R8**.

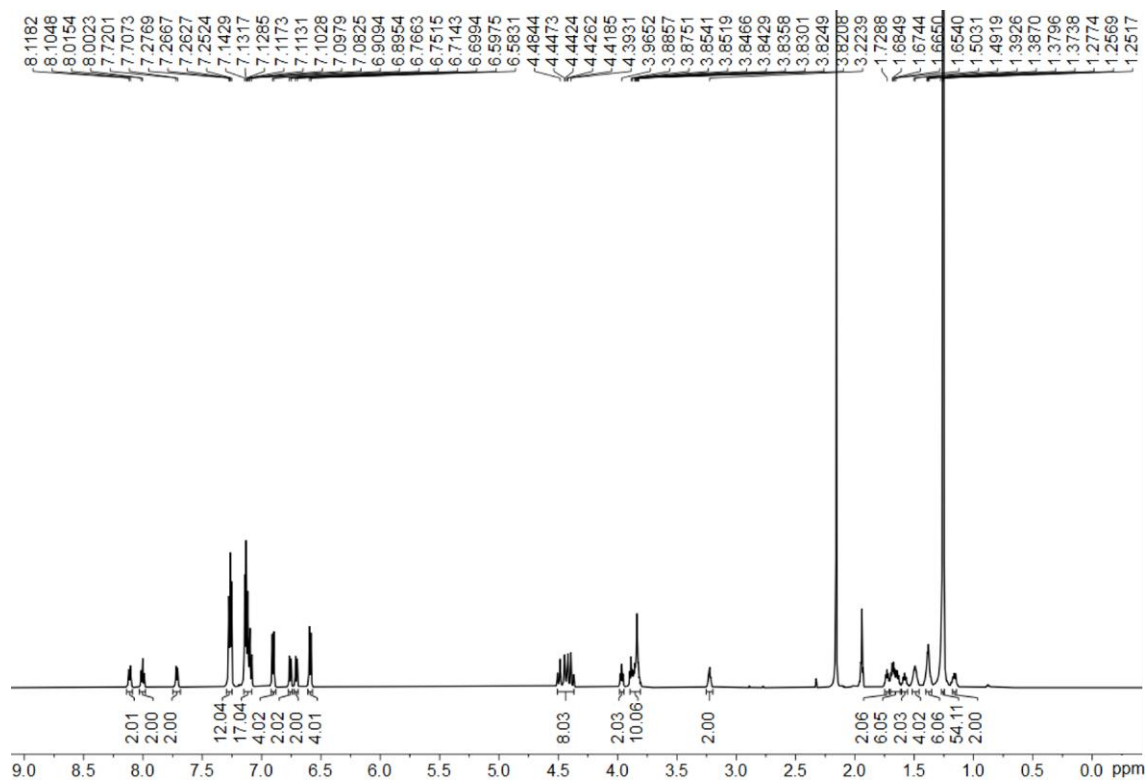

**Fig. S17.**  $^1\text{H}$  NMR (600 MHz,  $\text{CD}_3\text{CN}$ , 298 K) spectrum of  $[\text{Cu}(\mathbf{R8})](\text{PF}_6)$ .

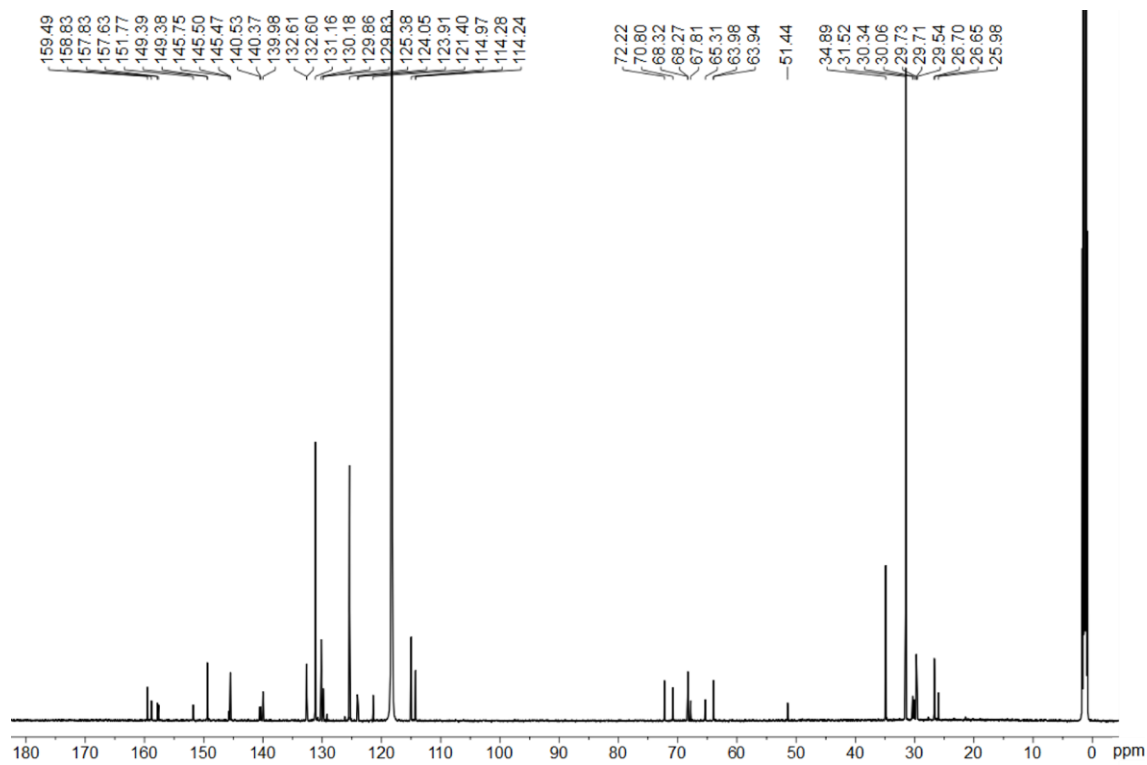

**Fig. S18.**  $^{13}\text{C}\{^1\text{H}\}$  NMR (151 MHz,  $\text{CD}_3\text{CN}$ , 298 K) spectrum of  $[\text{Cu}(\mathbf{R8})](\text{PF}_6)$ .

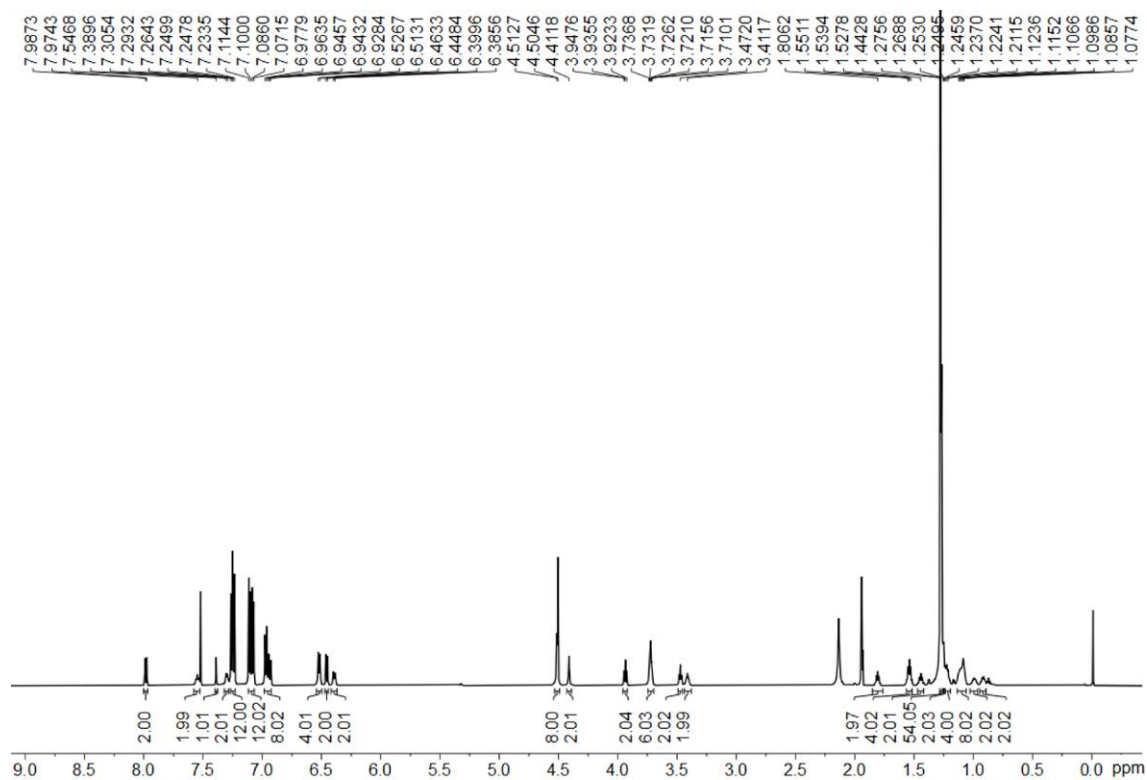

**Fig. S19.**  $^1\text{H}$  NMR (600 MHz,  $v/v = 1:2$   $\text{CDCl}_3/\text{CD}_3\text{CN}$ , 298 K) spectrum of **R10**.

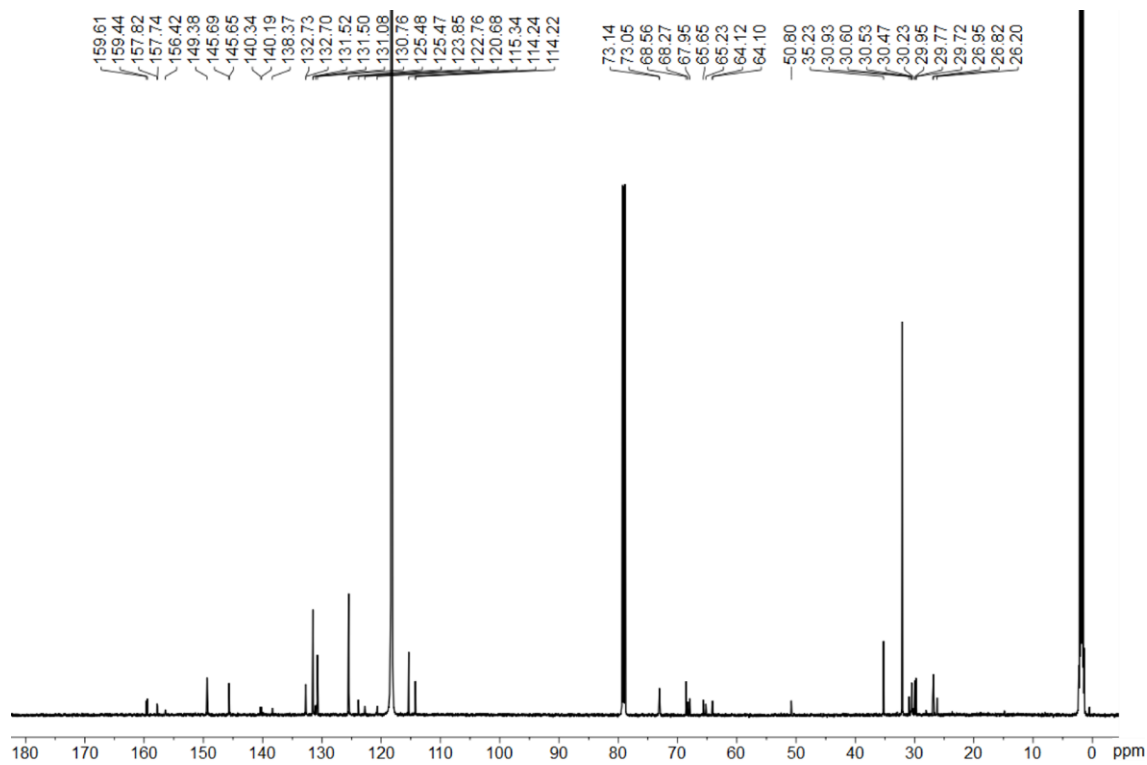

**Fig. S20.**  $^{13}\text{C}\{^1\text{H}\}$  NMR (151 MHz,  $v/v = 1:2$   $\text{CDCl}_3/\text{CD}_3\text{CN}$ , 298 K) spectrum of **R10**.

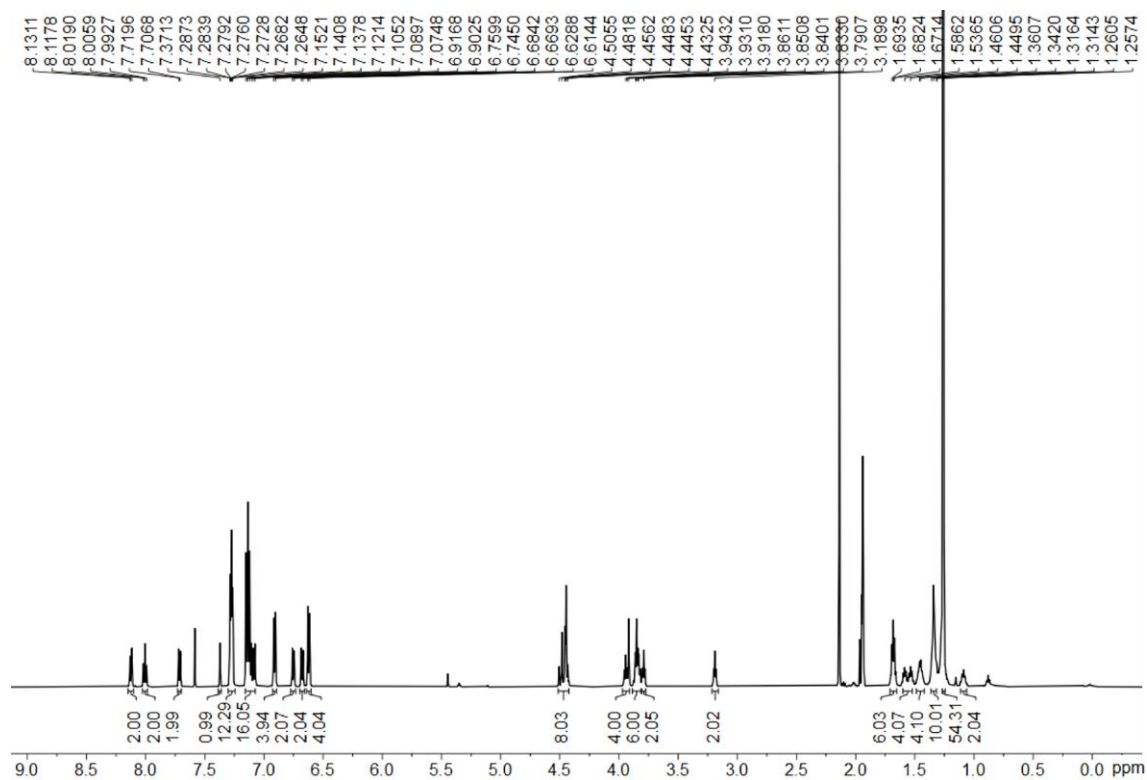

**Fig. S21.**  $^1\text{H}$  NMR (600 MHz,  $\text{CD}_3\text{CN}$ , 298 K) spectrum of  $[\text{Cu}(\mathbf{R10})](\text{PF}_6)$ .

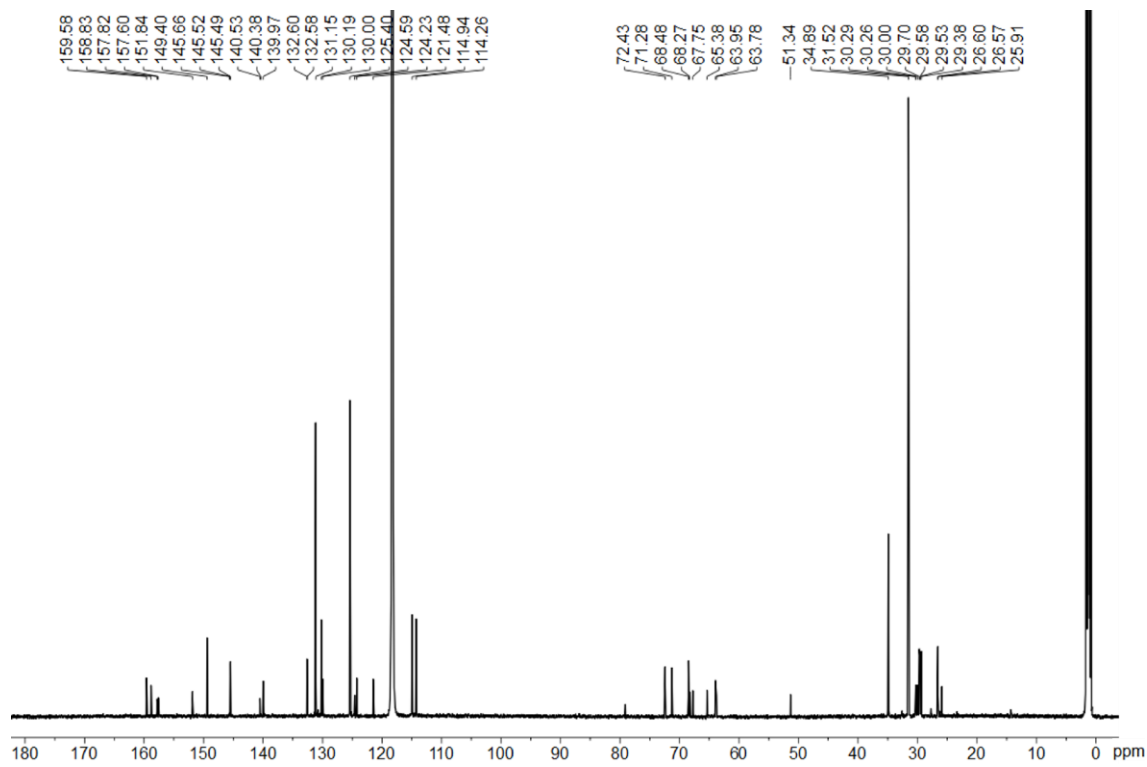

**Fig. S22.**  $^{13}\text{C}\{^1\text{H}\}$  NMR (151 MHz,  $\text{CD}_3\text{CN}$ , 298 K) spectrum of  $[\text{Cu}(\mathbf{R10})](\text{PF}_6)$ .

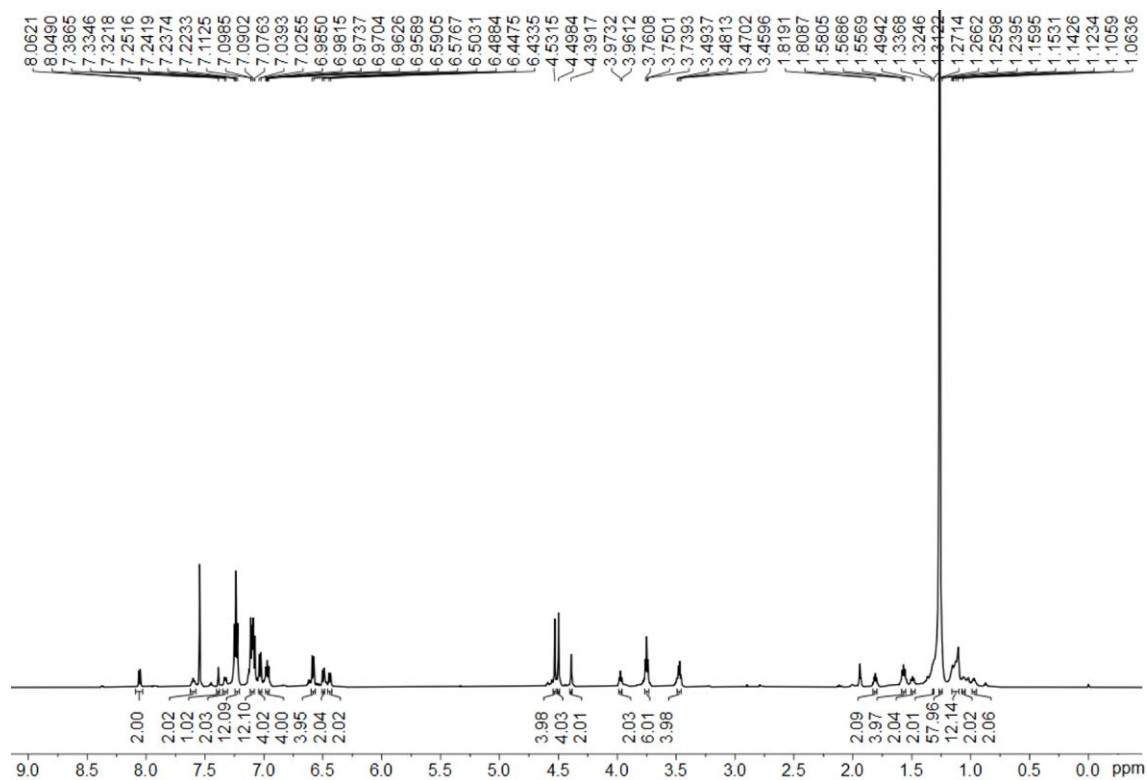

**Fig. S23.** <sup>1</sup>H NMR (600 MHz, *v/v* = 1:2 CDCl<sub>3</sub>/CD<sub>3</sub>CN, 298 K) spectrum of **R12**.

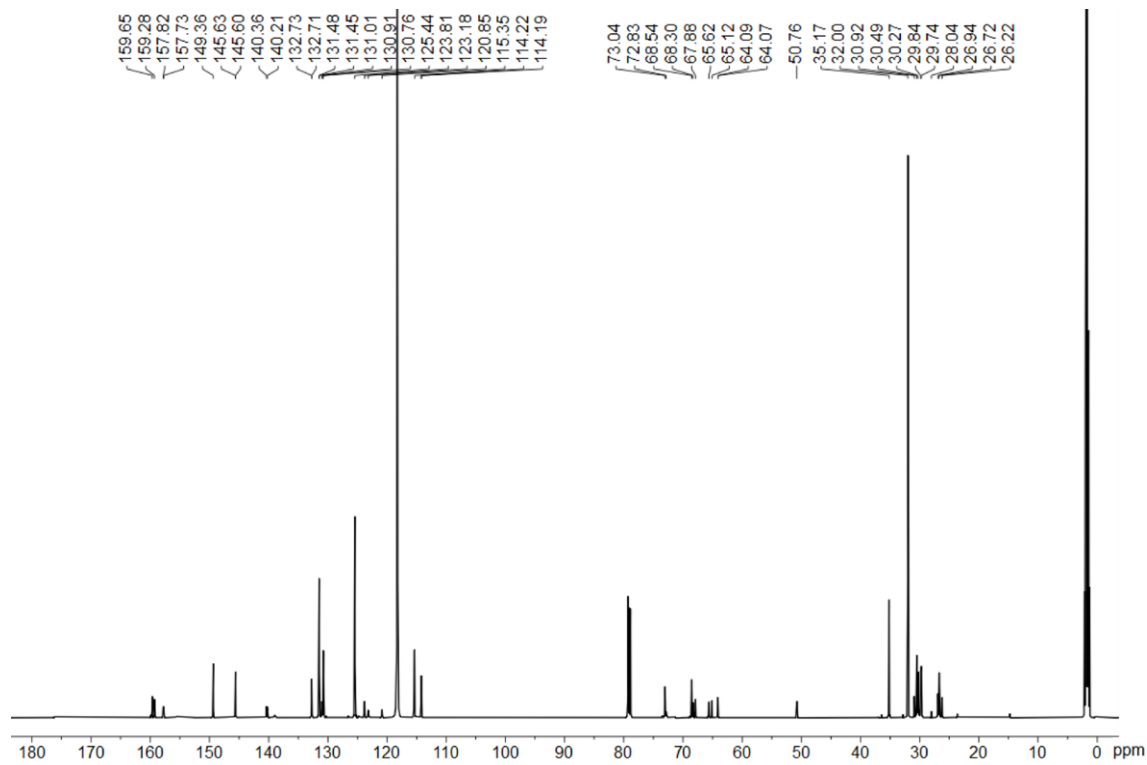

**Fig. S24.** <sup>13</sup>C {<sup>1</sup>H} NMR (151 MHz, *v/v* = 1:2 CDCl<sub>3</sub>/CD<sub>3</sub>CN, 298 K) spectrum of **R12**.

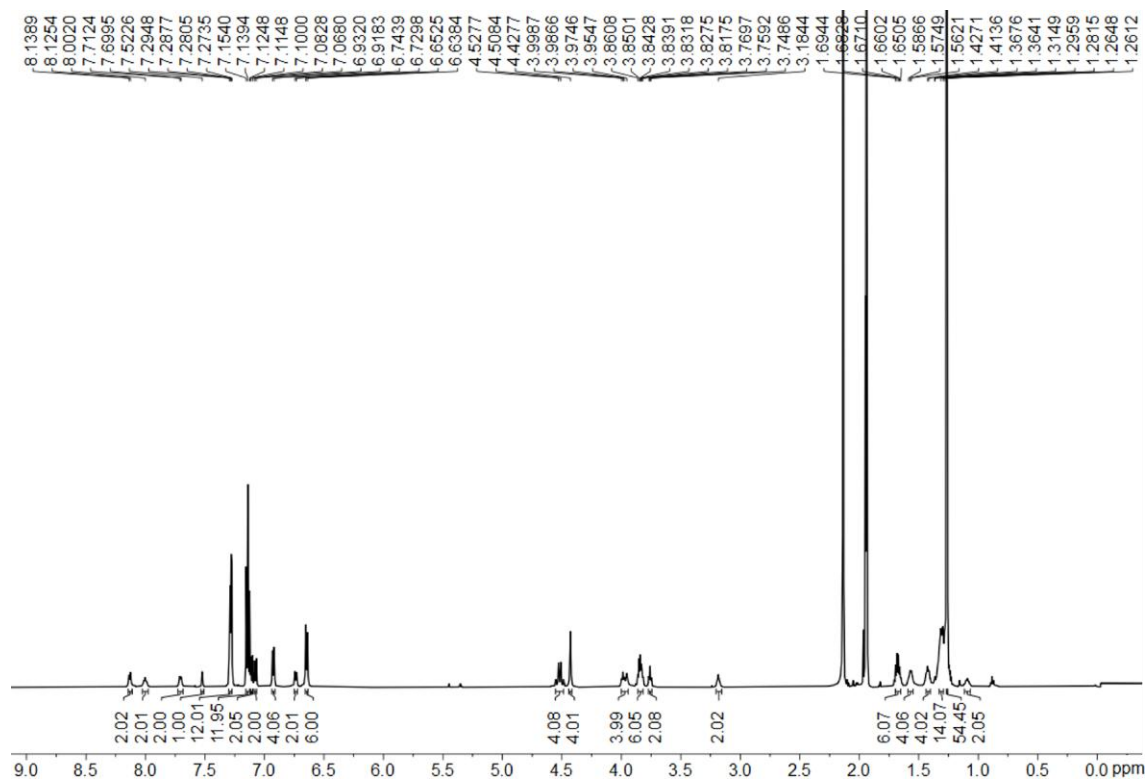

**Fig. S25.**  $^1\text{H}$  NMR (600 MHz,  $\text{CD}_3\text{CN}$ , 298 K) spectrum of  $[\text{Cu}(\text{R12})](\text{PF}_6)$ .

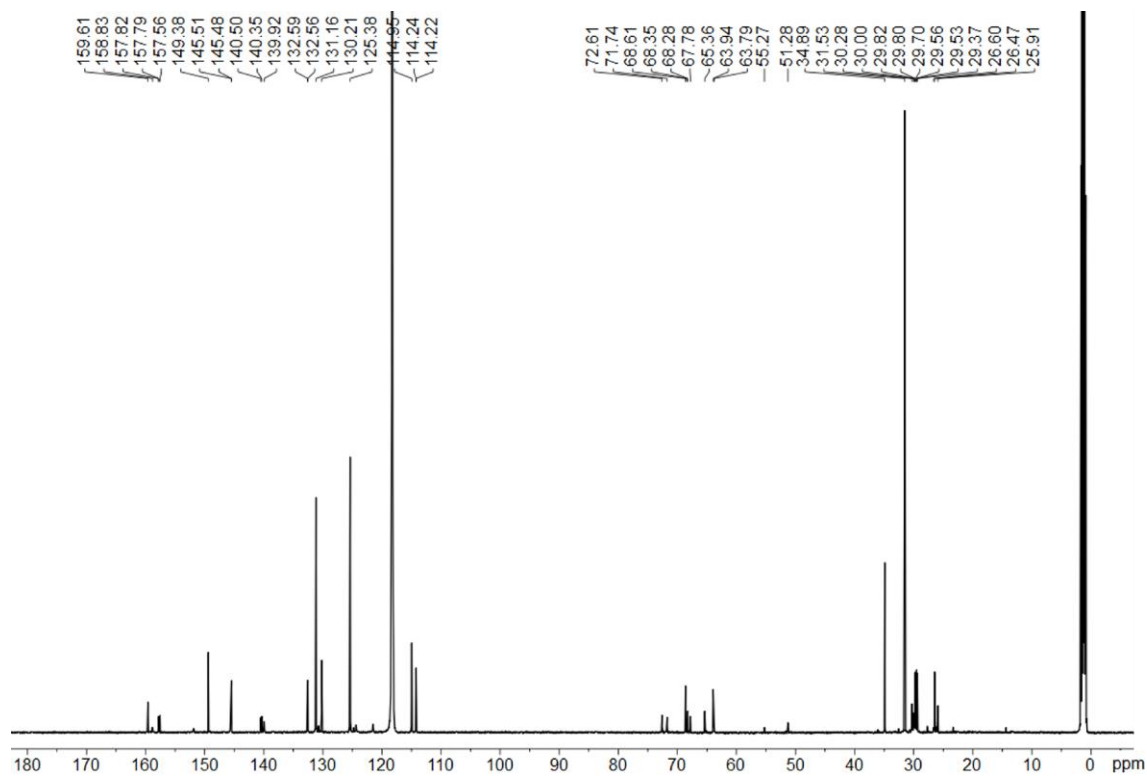

**Fig. S26.**  $^{13}\text{C}\{^1\text{H}\}$  NMR (151 MHz,  $\text{CD}_3\text{CN}$ , 298 K) spectrum of  $[\text{Cu}(\text{R12})](\text{PF}_6)$ .

**Table S1.** Partial  $^1\text{H}$  NMR shift analysis of the  $\text{PF}_6^-$  salts of  $[\text{Cu}(\mathbf{R}_n)]^+$ , ( $n = 4, 6, 8, 10, 12$ ).

|                                  | $^1\text{H}$ NMR (ppm) |                    |                    |                    |                    |                    |                    |
|----------------------------------|------------------------|--------------------|--------------------|--------------------|--------------------|--------------------|--------------------|
|                                  | $\delta\text{H}_6$     | $\delta\text{H}_7$ | $\delta\text{H}_8$ | $\delta\text{H}_m$ | $\delta\text{H}_p$ | $\delta\text{H}_k$ | $\delta\text{H}_n$ |
| $[\text{Cu}(\mathbf{R}_4)]^+$    | 6.93                   | 6.77–6.74          | 4.12–4.04          | 3.02               | 3.25               | 4.38               | 2.77               |
| $[\text{Cu}(\mathbf{R}_6)]^+$    | 6.88                   | 6.64–6.61          | 3.95–3.90          | 3.61               | 3.95               | 4.11               | 3.19               |
| $[\text{Cu}(\mathbf{R}_8)]^+$    | 6.90                   | 6.59               | 3.95–3.81          | 3.83               | 3.88               | 3.97               | 3.22               |
| $[\text{Cu}(\mathbf{R}_{10})]^+$ | 6.91                   | 6.62               | 3.89–3.81          | 3.85               | 3.79               | 3.94               | 3.19               |
| $[\text{Cu}(\mathbf{R}_{12})]^+$ | 6.93                   | 6.64               | 3.86–3.80          | 3.96               | 3.76               | 3.98               | 3.19               |

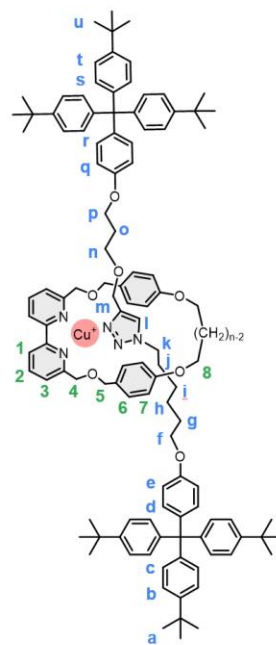

### 1.3 Mass Spectrometry.

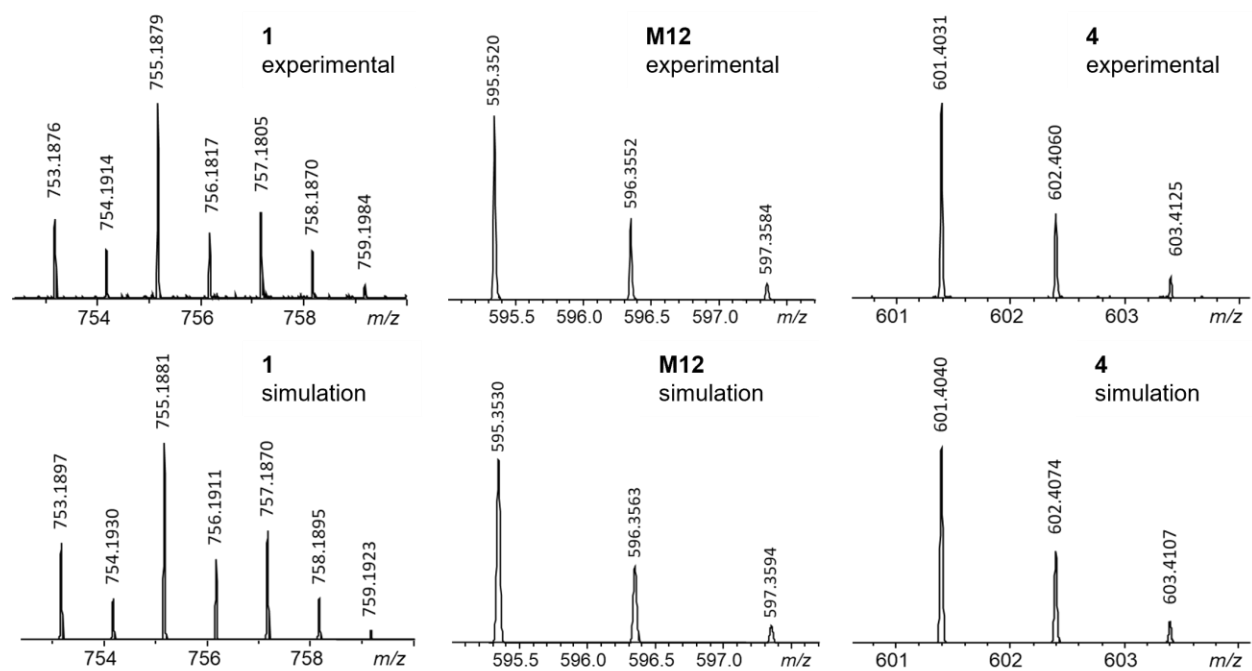

**Fig. S27.** HR-ESI-MS spectra of rotaxane precursors **1** (left), **M12** (middle) and **4** (right) reported in this work.

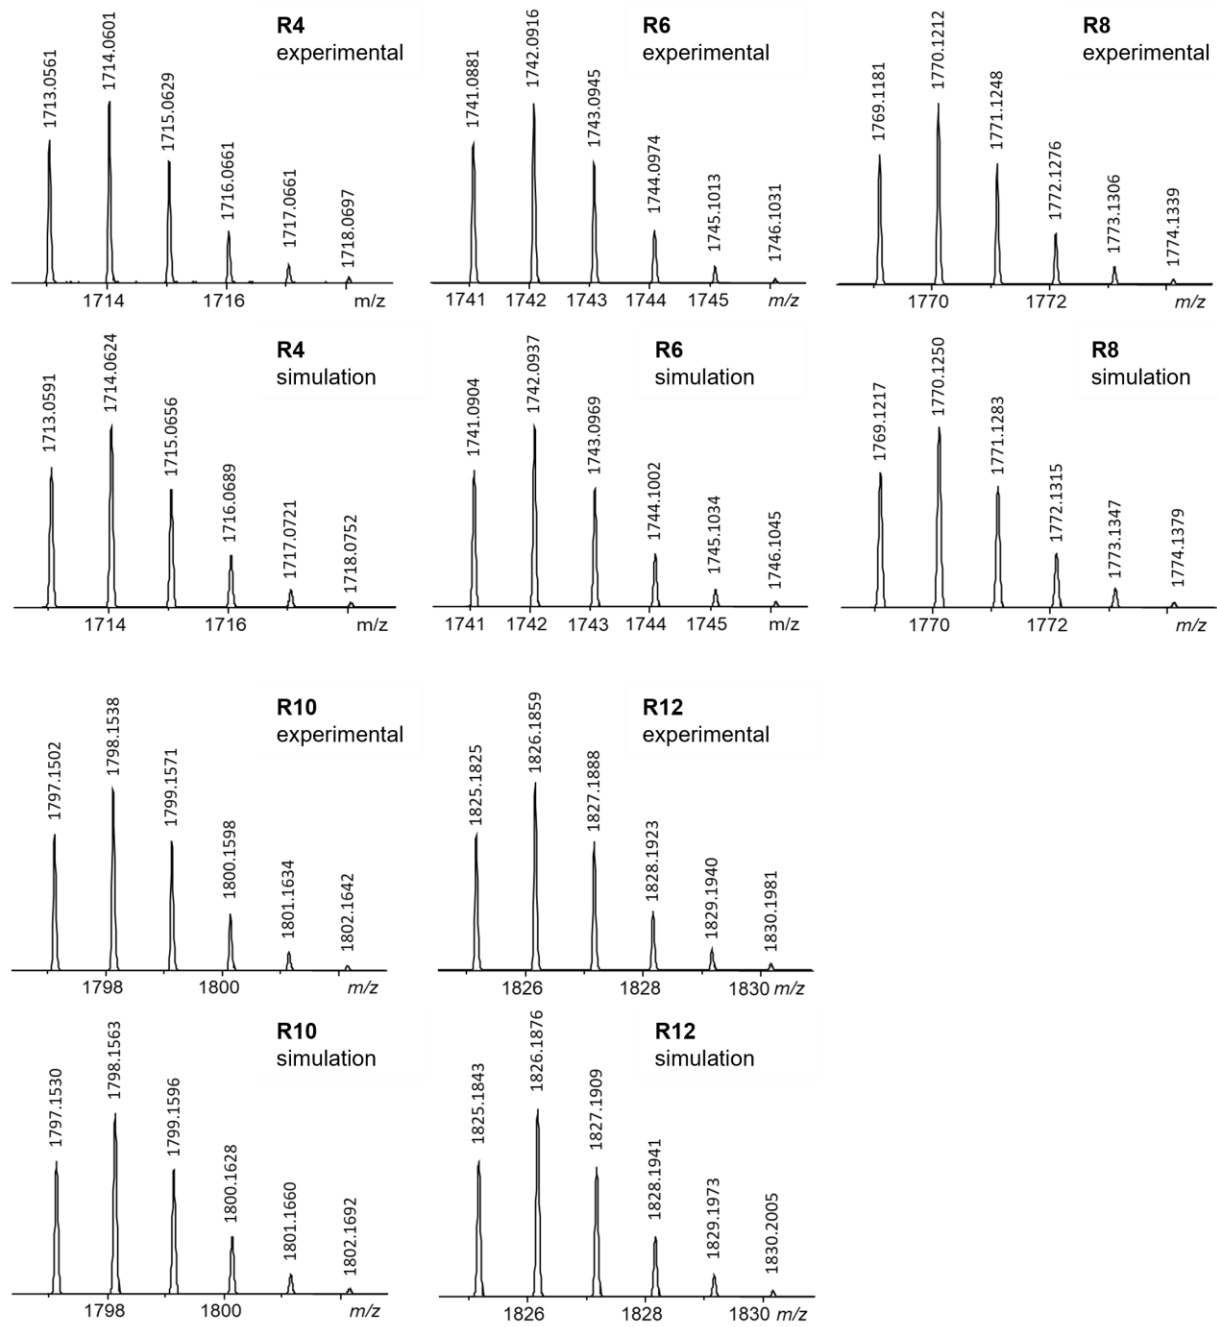

**Fig. S28.** HR-ESI-MS spectra of the [2]rotaxanes **R4**, **R6**, **R8**, **R10** and **R12**.

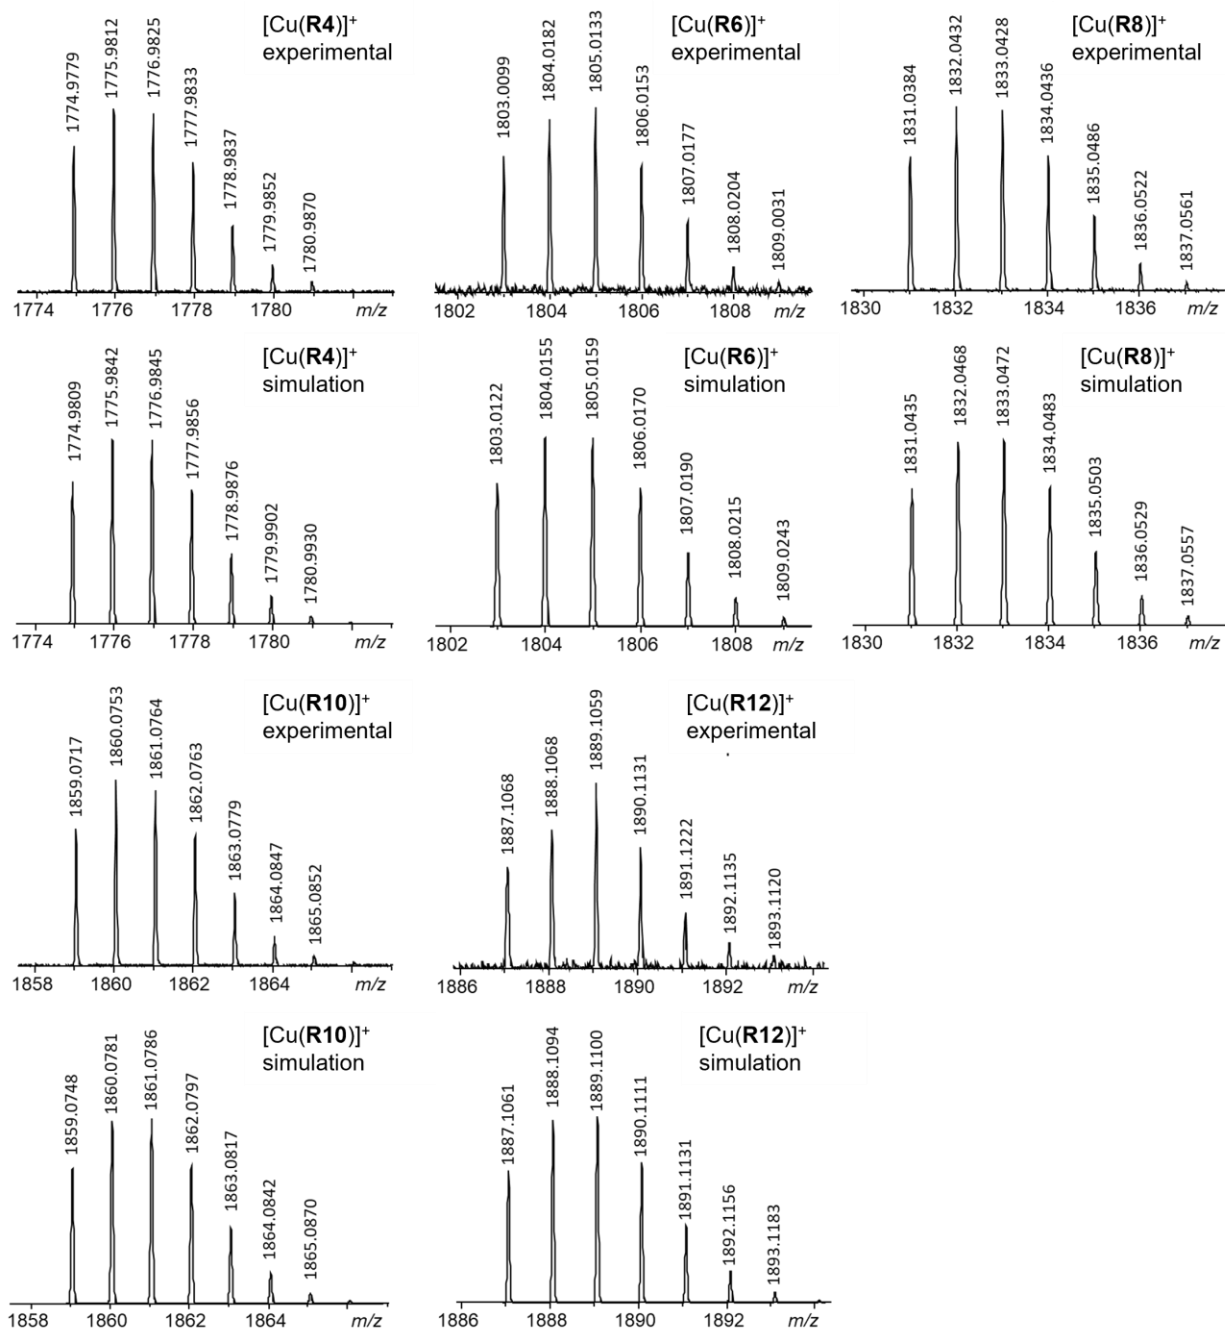

**Fig. S29.** HR-ESI-MS spectra of the Cu<sup>I</sup> [2]rotaxane complexes [Cu(R4)]<sup>+</sup>, [Cu(R6)]<sup>+</sup>, [Cu(R8)]<sup>+</sup>, [Cu(R10)]<sup>+</sup>, and [Cu(R12)]<sup>+</sup>.

## 1.4 X-ray Crystallography.

Bruker D8 VENTURE X-ray diffractometer was used for crystal screening, unit cell determination, and data collection for the X-ray crystal structure of [Cu(R6)](PF<sub>6</sub>). Data was collected using a Mo K $\alpha$  X-ray radiation ( $\lambda = 0.71073 \text{ \AA}$ ) at 100 K. The ShelXT program was used to solve the structure, and *Olex2* was used for the graphical interface.<sup>4</sup> The models were refined with ShelXL 2014/7 (Sheldrick, 2015) using full matrix Least Squares minimisation on  $F^2$ . SQUEEZE routine in PLATON was employed in the structural refinements. The X-ray crystallographic coordinates have been deposited at CCDC, under the deposition number 2457336, 2504020. These data can be obtained free of charge from CCDC via <https://www.ccdc.cam.ac.uk/structures/>.

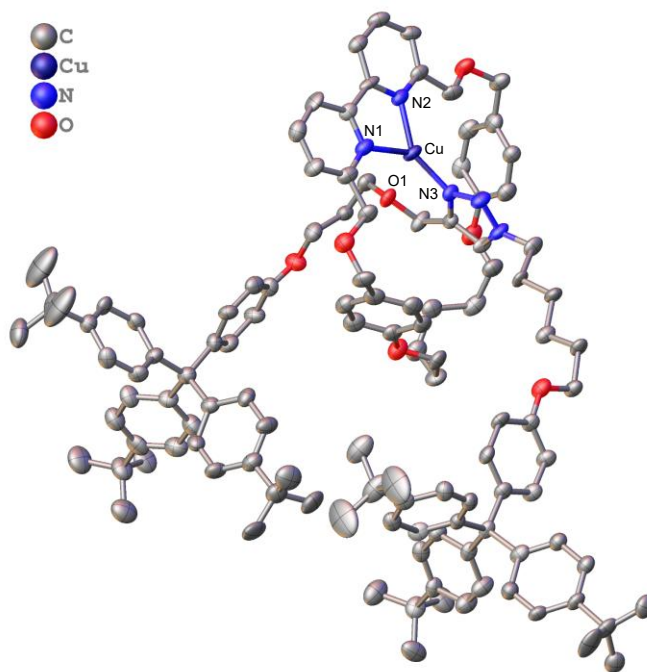

**Fig. S30.** Crystal structure of [Cu(R6)](PF<sub>6</sub>) (CCDC: 2457336). All H atoms have been omitted for clarity. Thermal ellipsoids are scaled to a 50% probability level.

**Table S2.** Selected crystal data and structure refinement data of [Cu(**R6**)](PF<sub>6</sub>).

|                                                       |                                                                                    |
|-------------------------------------------------------|------------------------------------------------------------------------------------|
| Moiety formula                                        | C <sub>118</sub> H <sub>141</sub> CuF <sub>6</sub> N <sub>5</sub> O <sub>7</sub> P |
| Formula weight                                        | 1947.98                                                                            |
| Crystal system                                        | Monoclinic                                                                         |
| Space group                                           | <i>P2<sub>1</sub>/n</i>                                                            |
| Color of crystal                                      | Orange                                                                             |
| Temperature/K                                         | 100                                                                                |
| <i>a</i> /Å                                           | 34.636(7)                                                                          |
| <i>b</i> /Å                                           | 16.348(3)                                                                          |
| <i>c</i> /Å                                           | 20.073(4)                                                                          |
| $\alpha$ /°                                           | 90                                                                                 |
| $\beta$ /°                                            | 92.404(5)                                                                          |
| $\gamma$ /°                                           | 90                                                                                 |
| Volume/Å <sup>3</sup>                                 | 11356(4)                                                                           |
| <i>Z</i>                                              | 4                                                                                  |
| $\rho_{\text{calc}}/\text{gcm}^3$                     | 1.213                                                                              |
| $\mu/\text{mm}^{-1}$                                  | 0.275                                                                              |
| F(000)                                                | 4416.0                                                                             |
| Crystal size/mm <sup>3</sup>                          | 0.04 × 0.02 × 0.02                                                                 |
| Radiation/Å                                           | MoK $\alpha$ ( $\lambda = 0.71073$ )                                               |
| $\theta_{\text{min}}, \theta_{\text{max}}/\text{°}$   | 2.756, 48.998                                                                      |
| Index ranges                                          | -40 ≤ <i>h</i> ≤ 40, 0 ≤ <i>k</i> ≤ 19, 0 ≤ <i>l</i> ≤ 23                          |
| Data/restraints/parameters                            | 18427/11/1322                                                                      |
| Final R indexes [ <i>I</i> ≥ 2 $\sigma$ ( <i>I</i> )] | <i>R</i> <sub>1</sub> = 0.1500, <i>wR</i> <sub>2</sub> = 0.3039                    |
| Final R indexes [all data]                            | <i>R</i> <sub>1</sub> = 0.1847, <i>wR</i> <sub>2</sub> = 0.3263                    |
| Largest diff. peak/hole / e Å <sup>-3</sup>           | 0.97/-1.03                                                                         |
| Restrained goodness of fit                            | 1.223                                                                              |

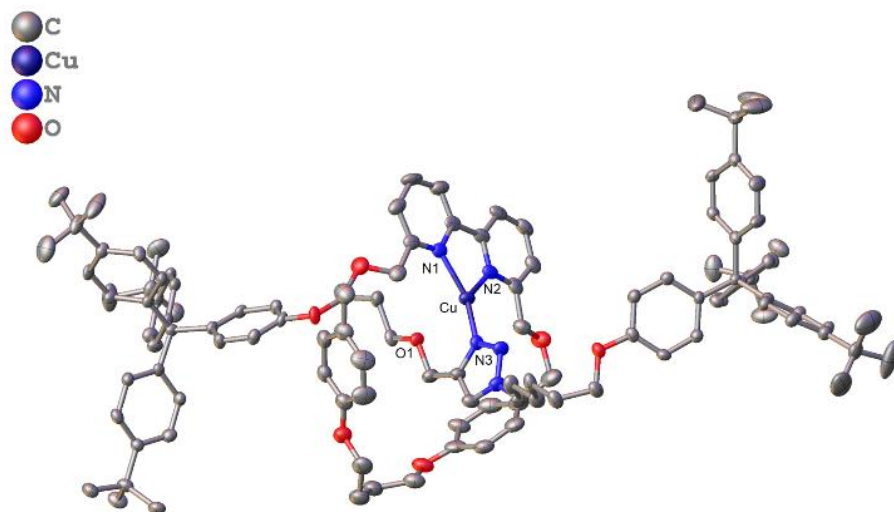

**Fig. S31.** Crystal structure of [Cu(**R4**)](PF<sub>6</sub>) (CCDC: 2504020). All H atoms have been omitted for clarity. Thermal ellipsoids are scaled to a 50% probability level.

**Table S3.** Selected crystal data and structure refinement data of [Cu(**R4**)](PF<sub>6</sub>).

|                                        |                                                                                    |
|----------------------------------------|------------------------------------------------------------------------------------|
| Moiety formula                         | C <sub>116</sub> H <sub>137</sub> CuF <sub>6</sub> N <sub>5</sub> O <sub>7</sub> P |
| Formula weight                         | 1919.95                                                                            |
| Crystal system                         | Triclinic                                                                          |
| Space group                            | P-1                                                                                |
| Color of crystal                       | Orange                                                                             |
| Temperature/K                          | 100                                                                                |
| <i>a</i> /Å                            | 14.1927(10)                                                                        |
| <i>b</i> /Å                            | 16.1321(10)                                                                        |
| <i>c</i> /Å                            | 27.927(2)                                                                          |
| <i>α</i> /°                            | 90.618(5)                                                                          |
| <i>β</i> /°                            | 104.435(5)                                                                         |
| <i>γ</i> /°                            | 108.908(4)                                                                         |
| Volume/Å <sup>3</sup>                  | 5828.9(7)                                                                          |
| <i>Z</i>                               | 2                                                                                  |
| $\rho_{\text{calc}}$ /gcm <sup>3</sup> | 1.203                                                                              |

|                                                   |                                                              |
|---------------------------------------------------|--------------------------------------------------------------|
| $\mu/\text{mm}^{-1}$                              | 0.945                                                        |
| F(000)                                            | 2256.0                                                       |
| Crystal size/ $\text{mm}^3$                       | $0.1 \times 0.05 \times 0.03$                                |
| Radiation/ $\text{\AA}$                           | CuK $\alpha$ ( $\lambda = 1.54178$ )                         |
| $\theta_{\text{min}}, \theta_{\text{max}}/^\circ$ | 3.284, 118.684                                               |
| Index ranges                                      | $-15 \leq h \leq 15, -17 \leq k \leq 17, -31 \leq l \leq 31$ |
| Data/restraints/parameters                        | 16816/105/1365                                               |
| Final R indexes [ $I \geq 2\sigma(I)$ ]           | $R_1 = 0.0767, wR_2 = 0.1886$                                |
| Final R indexes [all data]                        | $R_I = 0.1262, wR_2 = 0.2189$                                |
| Largest diff. peak/hole / $e \text{\AA}^{-3}$     | 1.18/-0.64                                                   |
| Restrained goodness of fit                        | 1.024                                                        |

## 2. Electrochemical Measurements.

### 2.1 General Methods.

Chemicals for synthesis were obtained from commercial sources and used as received unless otherwise stated. Electrochemical studies at pH 4 and pH 7 were performed in Britton–Robinson buffer (BR) containing  $\text{H}_3\text{BO}_3$  (0.04 M, 99.999%, Fisher Scientific),  $\text{CH}_3\text{COOH}$  (0.04 M, 100%, VWR),  $\text{H}_3\text{PO}_4$  (0.04 M, 85 wt % in  $\text{H}_2\text{O}$ , J&K Scientific),  $\text{NaClO}_4$  (0.1 M, 99.9%, Sigma-Aldrich) and Milli-Q ultrapure water ( $>18.2 \text{ M}\Omega \text{ cm}$ ). Solutions were adjusted to pH 4 and pH 7 respectively using NaOH (10 M, analytical grade, Merck Millipore), and subjected to 30-min sparging with either  $\text{N}_2$  or  $\text{O}_2$  (99.995% high-purity grade, Linde HKO) before electrochemical measurements.

### 2.2 Catalyst Ink Preparations.

Multiwalled carbon nanotubes were pretreated by immersing in 6 M HCl (Duksan, 37% GR) for 24 hours. The acid-treated carbon nanotubes were subsequently filtered, rinsed with Milli-Q ultrapure water, and dried overnight in a vacuum oven at  $80 \text{ }^\circ\text{C}$ . The Cu catalyst (2.0 mg) was dissolved in  $\text{CH}_3\text{CN}$  (RCI Labscan, AR) and mixed with the acid-treated carbon nanotubes (8.0 mg) to form a catalyst/carbon mixture. The mixture was sonicated for 5 min and subsequently vacuum-dried at  $37 \text{ }^\circ\text{C}$  overnight. The catalyst/carbon mixture (4.0 mg) was finely ground and then suspended in absolute  $\text{CH}_3\text{OH}$  (1.0 mL, Scharlab, Abs) and sonicated for 15 min. Nafion

perfluorinated resin (10  $\mu\text{L}$ , 5 wt% in lower aliphatic alcohols with 15–20% water, Sigma-Aldrich) was added to the well-dispersed catalyst ink. The catalyst ink was sonicated for an additional 10 min and was drop-casted (15.0  $\mu\text{L}$ ) onto a polished glassy carbon disk electrode ( $A = 0.196 \text{ cm}^2$ ). The electrode was then dried under a stream of  $\text{N}_2$ .

### 2.3 Electrochemical Activity Measurements.

The electrocatalytic oxygen reduction activity was evaluated in a three-electrode electrochemical cell. A polished glassy carbon (GC) electrode served as the working electrode, a graphite rod as the counter electrode, and an aqueous “no-leak” Ag/AgCl (3 M KCl, EDAQ Inc) as the reference electrode. At both pH 4 and pH 7, ORR onset potential is defined as the potential at which 10  $\mu\text{A}/\text{cm}^2$  current density is reached. The  $\text{Cu}^{\text{II/I}}$  redox properties of  $\text{Cu}^{\text{I}}$  rotaxanes were characterised in 0.1 M tetrabutylammonium hexafluorophosphate ( $\text{NBu}_4\text{PF}_6$ ) in  $\text{CH}_3\text{CN}$ , using GC as the working electrode and a graphite rod as the counter electrode, with an Ag wire immersed in 10 mM  $\text{AgNO}_3$  (in  $\text{CH}_3\text{CN}$ ) as a pseudo-reference. The  $\text{Cu}^{\text{II/I}}$  redox couples were referenced against 1 mM ferrocene ( $\text{Fc}/\text{Fc}^+$ ) in  $\text{NBu}_4\text{PF}_6$  in  $\text{CH}_3\text{CN}$ . Cyclic voltammetry (CV) and linear sweep voltammetry (LSV) experiments were conducted using a CH Instruments 660E potentiostat at a scan rate of 10 mV/s for ORR activity measurement and 100 mV/s for  $\text{Cu}^{\text{II/I}}$  and  $\text{Fc}/\text{Fc}^+$  redox measurements. All experiments were performed in triplicates, and error bars represent the standard deviations of the triplicate trials. The GC electrode was polished using a 3 to 0.5  $\mu\text{m}$  alumina suspension polishing kit (Allied Tech) and cleaned by electrochemical cycling from -0.4 to 1.7 V vs. Ag/AgCl in 0.1 M  $\text{HClO}_4$ . Electrochemical potentials were referenced to the reversible hydrogen electrode (RHE) according to established protocols.<sup>5,6</sup>

### 2.4 Product Quantification.

The electrocatalytic oxygen reduction selectivity was assessed through a colorimetric assay for  $\text{H}_2\text{O}_2$  quantification, following a previously reported protocol.<sup>7,8</sup> Briefly, the concentration of  $\text{H}_2\text{O}_2$  was determined using cerium(IV) sulfate ( $\text{Ce}(\text{SO}_4)_2$ ) titration at pH 4 and Amplex Red assay at pH 7. A solution of  $\text{Ce}(\text{SO}_4)_2$  (1.0 mM) was prepared by dissolving  $\text{Ce}(\text{SO}_4)_2 \cdot 4\text{H}_2\text{O}$  (4.0 mg) in 0.5 M  $\text{H}_2\text{SO}_4$  (10.0 mL). A standard curve for  $\text{H}_2\text{O}_2$  was generated by adding the prepared cerium titrant (0.1 mL) to  $\text{H}_2\text{O}_2$  solutions (0.9 mL) with known concentrations (0.5, 1.0, 2.0, 5.0, 10.0  $\mu\text{M}$ ). A working solution of Amplex Red was prepared by mixing of 10 mM Amplex Red (40  $\mu\text{L}$ ) in DMSO with of 0.05 M pH 7 sodium phosphate buffer (3.88 mL) containing of 10 U/mL

horseradish peroxidase (HRP) (80  $\mu\text{L}$ ). A standard curve for  $\text{H}_2\text{O}_2$  was generated by adding the prepared Amplex Red (0.5 mL) to  $\text{H}_2\text{O}_2$  solutions (0.5 mL) with known concentrations (1.0, 2.5, 5.0, 10.0  $\mu\text{M}$ ). The absorbance at 316 nm ( $\text{Ce}(\text{SO}_4)_2$  titration) and 571 nm (Amplex Red assay) were recorded respectively to determine the  $\text{H}_2\text{O}_2$  concentration based on the calibration curve.

## 2.5 Calculations of $\text{H}_2\text{O}$ Selectivity.

The number of electrons transferred per  $\text{O}_2$  molecule ( $n$ ) during oxygen reduction reaction by the  $\text{Cu}^{\text{I}}$  rotaxane complexes was determined following a reported method,<sup>9,10</sup> where  $x$  represents the mole fraction of  $\text{O}_2$  consumed for  $\text{H}_2\text{O}_2$  generation, relative to total  $\text{O}_2$  consumed for  $\text{H}_2\text{O}_2$  and  $\text{H}_2\text{O}$  generation.

$$n = 4(1 - x) + 2x$$

$$x = \frac{\text{mole of } \text{O}_2 \text{ reduced (H}_2\text{O}_2\text{)}}{\text{total mole of } \text{O}_2 \text{ reduced (H}_2\text{O}_2 + \text{H}_2\text{O})}$$

$$\% \text{H}_2\text{O} = \frac{n - 2}{2} \times 100 \%$$

## 2.6 Metal Quantifications.

The quantity of Cu in catalyst-loaded was determined using inductively coupled plasma mass spectrometry (ICP-MS) (Agilent 7700x). The catalyst ink (10  $\mu\text{L}$ ) was added in aqua regia (9.99 mL, 1:3 v/v  $\text{HNO}_3$ : $\text{HCl}$ ) and left standing for 24 h. The resulting catalyst/acid mixture was filtered using a PES syringe filter (Labfil, 0.22  $\mu\text{m}$ ). The filtrate (490  $\mu\text{L}$ ) and an internal standard (10000 ppb Rh, 10  $\mu\text{L}$ ) were added to 1%  $\text{HNO}_3$  (9.5 mL).

## 2.7 Experimental Results.

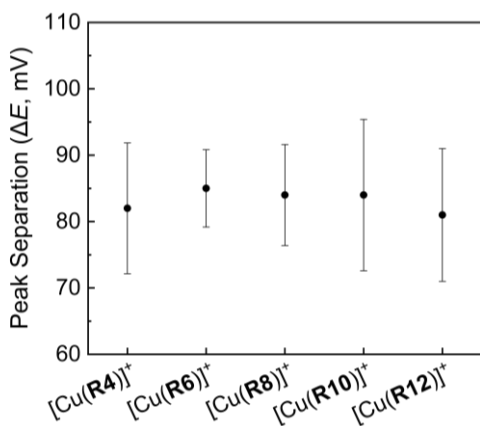

**Fig. S32.** Cu<sup>II/I</sup> redox characterisation of Cu<sup>I</sup> rotaxanes. Peak separation ( $\Delta E$ ) of the Cu<sup>II/I</sup> redox couple in 0.1 M NBu<sub>4</sub>PF<sub>6</sub> in CH<sub>3</sub>CN. Error bars represent the standard deviations of the triplicate trials.

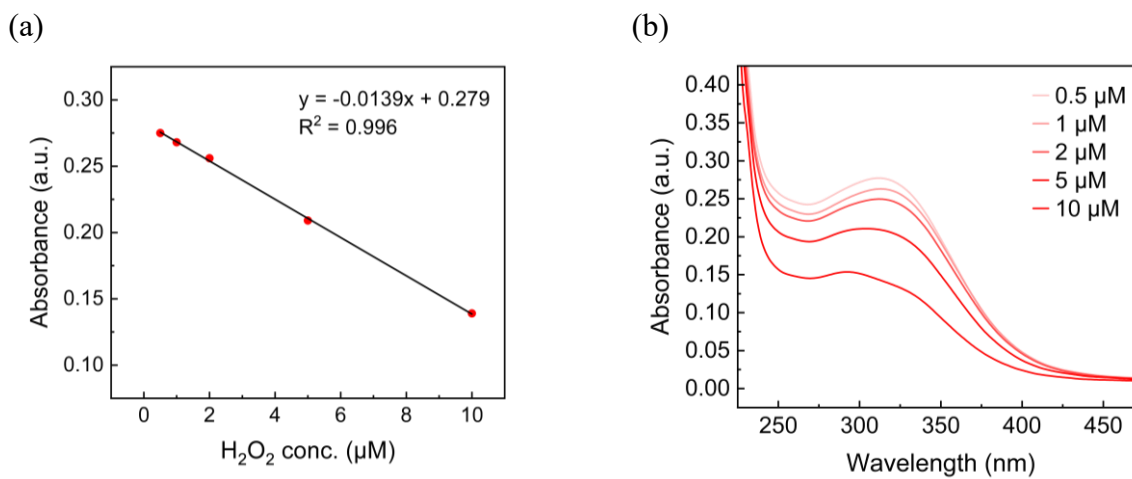

**Fig. S33.** H<sub>2</sub>O<sub>2</sub> colorimetric assay using Ce(SO<sub>4</sub>)<sub>2</sub> titration method. (a) Standard curve of H<sub>2</sub>O<sub>2</sub> with known concentrations. (b) UV-vis absorption spectra of the H<sub>2</sub>O<sub>2</sub> standards.

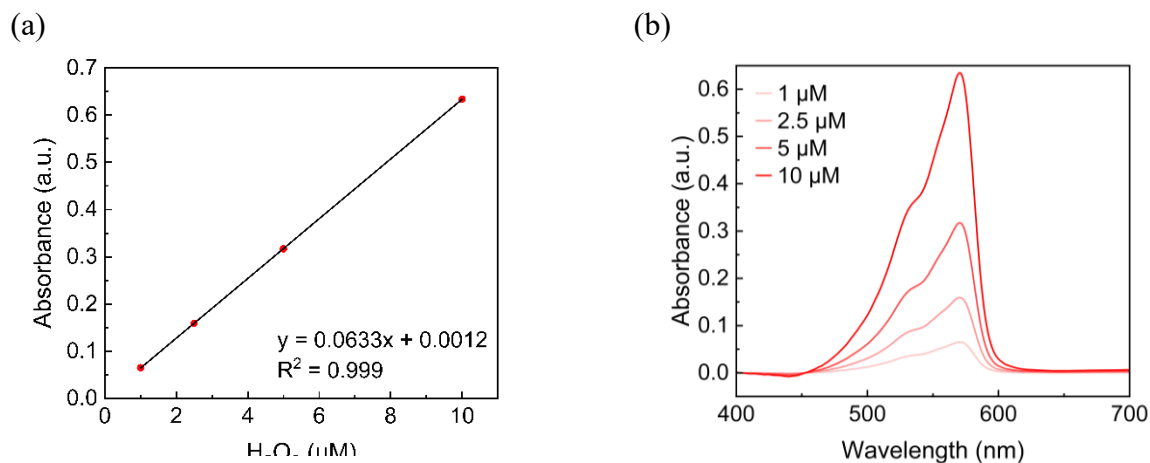

**Fig. S34.** H<sub>2</sub>O<sub>2</sub> colorimetric assay using Amplex Red assay. (a) Standard curve of H<sub>2</sub>O<sub>2</sub> with known concentrations. (b) UV-vis absorption spectra of the H<sub>2</sub>O<sub>2</sub> standards.

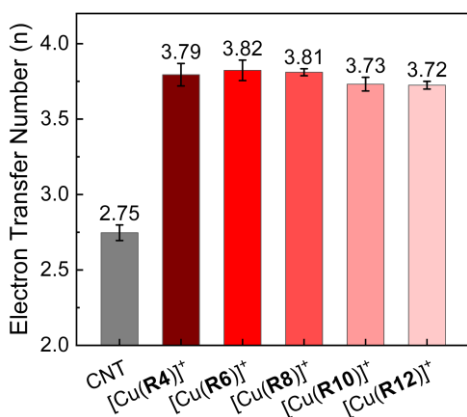

**Fig. S35.** Electron transfer number (n) of ORR catalysed by carbon nanotubes (CNT), [Cu(R4)]<sup>+</sup>, [Cu(R6)]<sup>+</sup>, [Cu(R8)]<sup>+</sup>, [Cu(R10)]<sup>+</sup>, and [Cu(R12)]<sup>+</sup> supported on glassy carbon electrode (GC) in pH 4 BR buffer. Error bars represent the standard deviations of the triplicate trials.

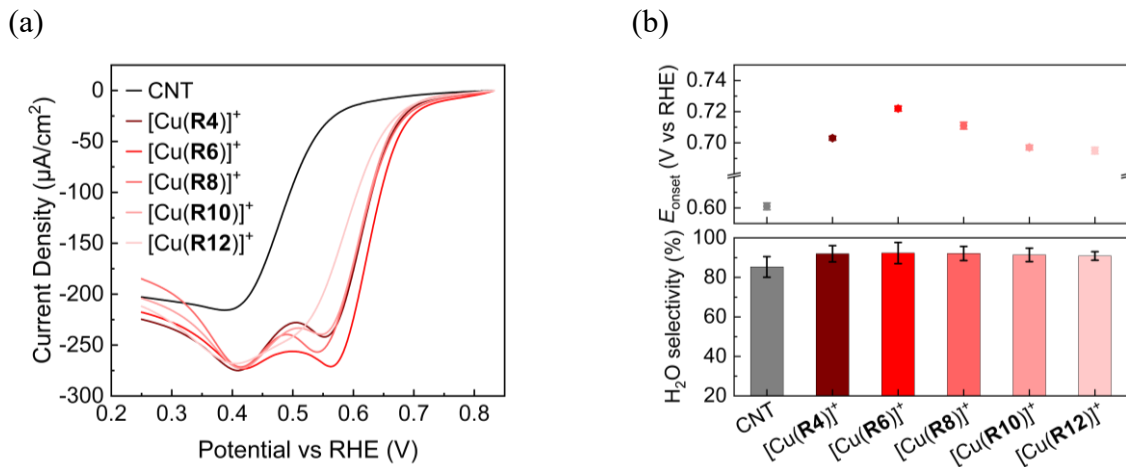

**Fig. S36.** (a) Linear sweep voltammograms of carbon nanotubes (CNT), [Cu(R4)]<sup>+</sup>, [Cu(R6)]<sup>+</sup>, [Cu(R8)]<sup>+</sup>, [Cu(R10)]<sup>+</sup>, and [Cu(R12)]<sup>+</sup> supported on glassy carbon electrode (GC) in O<sub>2</sub>-saturated pH 7 BR buffer, and (b) their respective ORR onset potential and product selectivity. The ORR onset potential is defined as the potential at which 10 µA/cm<sup>2</sup> is reached. Error bars represent the standard deviations of the triplicate trials.

At both pH 4 and pH 7, a second ORR reduction peak was observed in the LSV curves for all Cu<sup>I</sup> rotaxanes, occurring at *c.a.* 0.25 V (vs. RHE) and *c.a.* 0.40 V (vs. RHE), respectively (Fig. 4, S36). This peak is attributed to the background ORR activity of the CNT support.

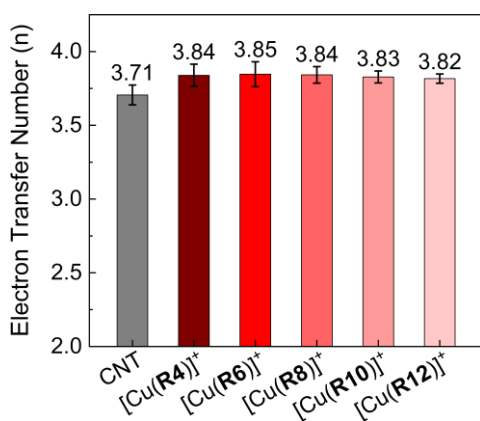

**Fig. S37.** Electron transfer number (n) of ORR catalysed by carbon nanotubes (CNT), [Cu(R4)]<sup>+</sup>, [Cu(R6)]<sup>+</sup>, [Cu(R8)]<sup>+</sup>, [Cu(R10)]<sup>+</sup>, and [Cu(R12)]<sup>+</sup> supported on glassy carbon electrode (GC) in pH 7 BR buffer. Error bars represent the standard deviations of the triplicate trials.

**Table S4.** ORR onset potentials and electron transfer number of reported molecular Cu catalysts.

| Molecular Cu complexes                                                                   | Onset potential (V vs RHE) |      | Electron transfer number (n) |      | References |
|------------------------------------------------------------------------------------------|----------------------------|------|------------------------------|------|------------|
|                                                                                          | pH 4                       | pH 7 | pH 4                         | pH 7 |            |
| [Cu( <b>R6</b> )] <sup>+</sup>                                                           | 0.58                       | 0.72 | 3.8                          | 3.9  | This work  |
| [Cu(2-(5-(pyren-1-yl) pentyl)-9-methyl-1,10-phenanthroline) <sub>2</sub> ] <sup>2+</sup> | 0.86 (pH 5)                | -    | 3.9 (pH 5)                   | -    | 11         |
| [Cu(2,9-Me <sub>2</sub> -phen) <sub>2</sub> ] <sup>+</sup>                               | 0.72 (pH 5.2)              | -    | 2.7 (pH 5.2)                 | -    | 12         |
| [Cu(2,9-Me <sub>2</sub> -4,7-Ph <sub>2</sub> -phen) <sub>2</sub> ] <sup>+</sup>          | 0.69 (pH 5.2)              | -    | 2.9 (pH 5.2)                 | -    | 12         |
| [Cu(3,8-Br <sub>2</sub> -phen) <sub>2</sub> ] <sup>+</sup>                               | 0.61 (pH 5.2)              | -    | 3.8 (pH 5.2)                 | -    | 12         |
| [Cu(LH)] <sup>2+</sup>                                                                   | 0.60 (pH 5)                | -    | 3.3 (pH 5)                   | -    | 13         |
| [Cu(5-Cl-phen) <sub>2</sub> ] <sup>+</sup>                                               | 0.60 (pH 5.2)              | -    | 3.1 (pH 5.2)                 | -    | 12         |
| Au Cu(DAT)                                                                               | <i>ca.</i> 0.6 (pH 5.2)    | -    | -                            | -    | 14         |
| [Cu(phen) <sub>2</sub> ] <sup>+</sup>                                                    | 0.58 (pH 5.2)              | -    | 3.1 (pH 5.2)                 | -    | 12         |
| [Cu(2,9-Et <sub>2</sub> -phen)] <sup>2+</sup>                                            | 0.59 (pH 4.8)              | -    | -                            | -    | 15,16      |
| [Cu(TPA)] <sup>2+</sup>                                                                  | 0.57                       | 0.69 | 3.6                          | -    | 5          |
| [Cu <sub>2</sub> (BPMP-pyrene)] <sup>2+</sup>                                            | 0.57                       | -    | 2.7                          | -    | 17         |
| [Cu(PMAP)] <sup>2+</sup>                                                                 | 0.57                       | -    | 2.5                          | -    | 5          |
| [Cu(4,7-Me <sub>2</sub> -phen) <sub>2</sub> ] <sup>+</sup>                               | 0.56 (pH 5.2)              | -    | 3.7 (pH 5.2)                 | -    | 12         |
| [Cu(3,4,7,8-Me <sub>4</sub> -phen) <sub>2</sub> ] <sup>+</sup>                           | 0.55 (pH 5.2)              | -    | 3.8 (pH 5.2)                 | -    | 12         |
| [Cu(2,9-nBu <sub>2</sub> -phen)] <sup>2+</sup>                                           | 0.55 (pH 4.8)              | -    | -                            | -    | 15,16      |
| Cu(phen <sup>C</sup> )                                                                   | 0.53 (pH 4.8)              | -    | 3.6 (pH 4.8)                 | -    | 18         |

|                                                         |                         |      |                |                    |    |
|---------------------------------------------------------|-------------------------|------|----------------|--------------------|----|
| [Cu(TPT)] <sup>2+</sup>                                 | 0.51 (pH 5.3)           | -    | 1.9            | -                  | 19 |
| [Cu(5-Cl-phen)] <sup>2+</sup>                           | 0.49 (pH 5.2)           | -    | <i>ca.</i> 3.5 | -                  | 20 |
| [Cu(TPP)] <sup>2+</sup>                                 | 0.44                    | -    | -              | -                  | 21 |
| [Cu(2-Cl-phen) <sub>2</sub> ] <sup>+</sup>              | 0.42 (pH 5.2)           | -    | 2.8 (pH 5.2)   | -                  | 12 |
| [Cu(4,7-dppds)] <sup>2+</sup>                           | 0.41 (pH 5.3)           | -    | -              | -                  | 22 |
| PG Cu(DAT)                                              | <i>ca.</i> 0.4 (pH 5.2) | --   | 1.2 (pH 5.2)   | -                  | 14 |
| [Cu(phen)]/Au                                           | 0.40                    | -    | -              | -                  | 23 |
| [Cu(3-ethynyl-phen)] <sup>+</sup>                       | 0.39 (pH 4.8)           | -    | 3.6            | -                  | 18 |
| [Cu(phen)] <sup>2+</sup>                                | 0.30 (pH 4.8)           | -    | -              | -                  | 24 |
| MWCNT@BTAH-Cu <sup>2+</sup>                             | -                       | 0.74 | -              | <i>ca.</i> 3.8     | 25 |
| Cu(ImBenz-NO <sub>2</sub> )Cl <sub>2</sub>              | -                       | 0.69 | -              | 3.5–3.8            | 26 |
| [Cu(C10)] <sup>+</sup>                                  | -                       | 0.62 | -              | <i>ca.</i> 3.8     | 6  |
| [Cu(3,5-dimethyl-4-amino-1,2,4-triazole)] <sup>2+</sup> | -                       | 0.58 | -              | -                  | 16 |
| [Cu(trpn)(Im)] <sup>2+</sup>                            | -                       | 0.58 | -              | -                  | 27 |
| [Cu(baEtO)(Im)] <sup>2+</sup>                           | -                       | 0.57 | -              | -                  | 28 |
| Cu <sup>2+</sup> :L <sub>2</sub>                        | -                       | 0.55 | -              | 3.2–3.8            | 29 |
| [Cu(dpaq)] <sup>+</sup>                                 | -                       | 0.50 | -              | 3.8                | 30 |
| CuPoly-CB                                               | -                       | 0.50 | -              | 2.7                | 31 |
| [Cu(bmpa)] <sup>2+</sup>                                | -                       | 0.49 | -              | <i>ca.</i> 2.5–2.7 | 32 |
| Cu-tpmen                                                | -                       | 0.47 | -              | <i>ca.</i> 2.3-3.2 | 33 |
| Cu-tpbn-Me <sub>2</sub> bpy                             | -                       | 0.46 | -              | 2.9–3.4            | 34 |

|                           |   |      |   |             |    |
|---------------------------|---|------|---|-------------|----|
| [Cu(terpy)] <sup>2+</sup> | - | 0.45 | - | ca. 2.5–2.7 | 32 |
|---------------------------|---|------|---|-------------|----|

LH = (2-tert-butyl-6-{{[(6-methyl-pyridin-2-ylmethyl)-pyridin-2-ylmethyl-amino]-methyl}-4-({4-[(pyren-1-ylmethyl)-amino]-butylamino}-methyl)-phenol), Au| = modified gold electrode; DAT = 3,5-diamino-1,2,4-triazole, TPA = tris(2-pyridylmethyl)amine, BPMP = 2,6-bis[(bis(2-pyridylmethyl)amino)methyl]-phenol, PMAP = bis[2-(2-pyridyl)ethyl]-(2-pyridyl)methylamine, phen<sup>c</sup> = 3-ethynyl-1,10-phenanthroline was covalently attached to an azide-modified glassy carbon electrode by cycloaddition, TPT = 2,4,6-tris(2-pyridyl)-1,3,5-triazine, TPP = 5,10,15,20-tetraphenyl-21H,23H-porphyrin, dppds = 4,7-diphenyl-1,10-phenanthroline disulfonate, PG| = modified pyrolytic graphite electrode, BTAH = 1,2,3-benzotriazole, ImBenz-NO<sub>2</sub> = 2-(1-(2,6-diisopropylphenyl)-1H-imidazol-2-yl)-5-nitro-1H-benzo[d]imidazole], C10 = [2]catenane derivatives, trpn = tris(3-aminopropyl)amine, baEtO = 2-[bis(2-aminoethyl)amino]ethanol, L<sub>2</sub> = ligand obtained from polymerizations of poly(ethylene glycol) diglycidyl ether (PEGDGE) and 2,2'-bipyridine-5,5'-dicarboxylic acid, dpaq = 2-[bis(pyridine-2-ylmethyl)]amino-N-quinolin-8-yl-acetamidate, Poly, = pyrene-terminated poly(2-hydroxy-3-dipicolylamino) propyl methacrylate (Py-PGMADPA); CB = carbon black, bmpa = bis(2-pyridylmethyl)amine, tpbn = tetrapyridylalkylamine N,N,N',N'-tetrakis(2-pyridyl-methyl)-1,4-butanediamine, terpy = 2,2':6',2''-terpyridine, tpmen = N,N,N'-tris(2-pyridylmethyl)-N'-methylethylenediamine.

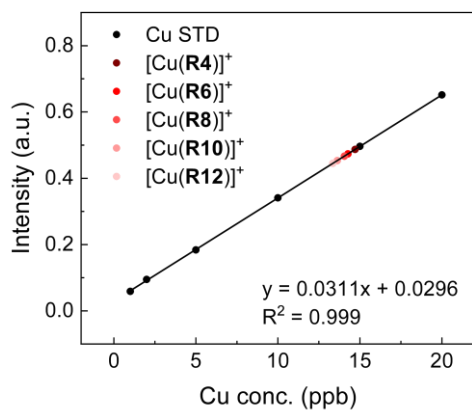

**Fig. S38.** ICP-MS results of Cu<sup>I</sup> rotaxane complexes.

**Table S5.** Concentration of Cu metal in rotaxane complexes.

| Samples                | Cu/Rh ratio | Cu conc. ( $\mu\text{mol}/\text{cm}^2$ ) |
|------------------------|-------------|------------------------------------------|
| [Cu(R4)] <sup>+</sup>  | 0.487       | 0.0236                                   |
| [Cu(R6)] <sup>+</sup>  | 0.473       | 0.0229                                   |
| [Cu(R8)] <sup>+</sup>  | 0.467       | 0.0226                                   |
| [Cu(R10)] <sup>+</sup> | 0.453       | 0.0219                                   |
| [Cu(R12)] <sup>+</sup> | 0.445       | 0.0214                                   |

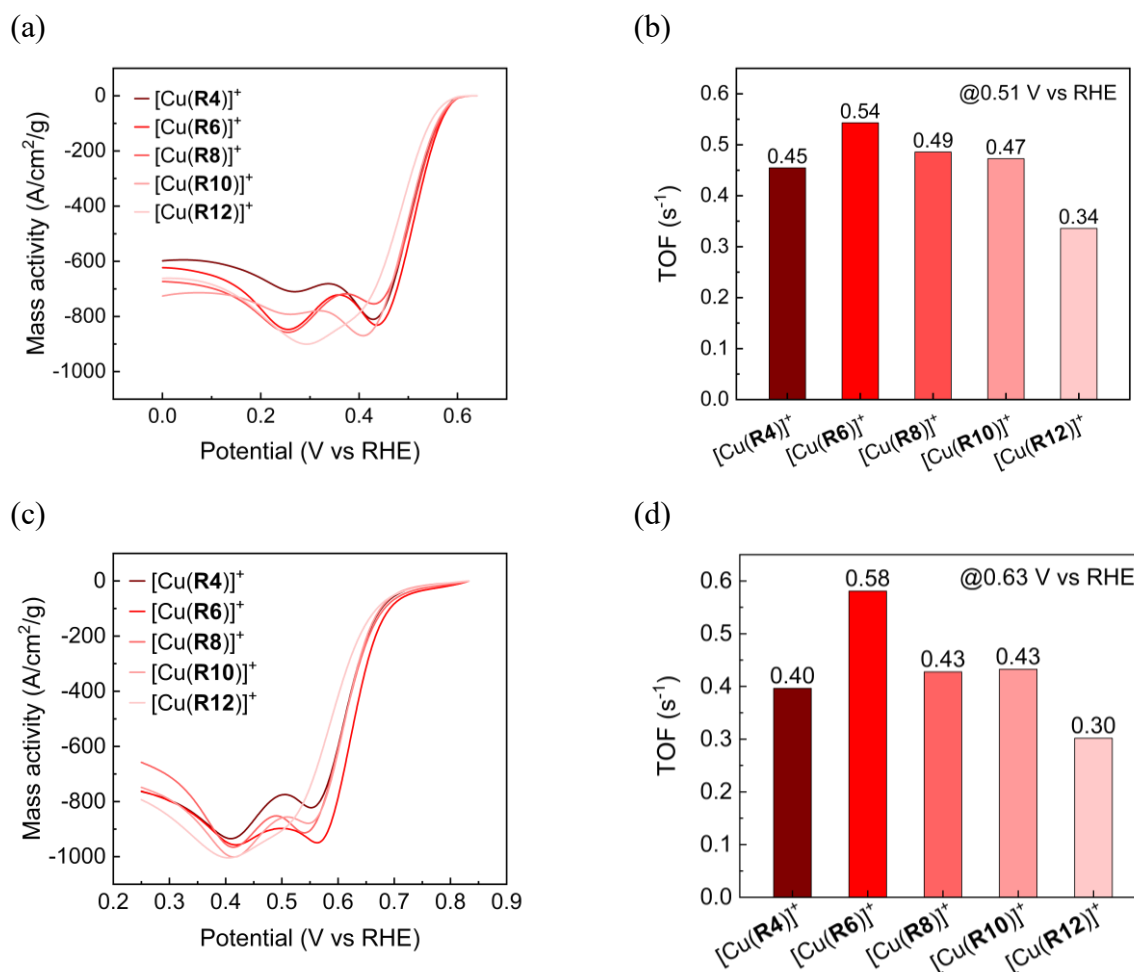

**Fig. S39.** Mass activity and turnover frequency (TOF) of [Cu(R4)]<sup>+</sup>, [Cu(R6)]<sup>+</sup>, [Cu(R8)]<sup>+</sup>, [Cu(R10)]<sup>+</sup>, and [Cu(R12)]<sup>+</sup> with their ORR current densities normalized by Cu quantity in (a, b) pH 4 BR buffer and (c, d) pH 7 BR buffer.

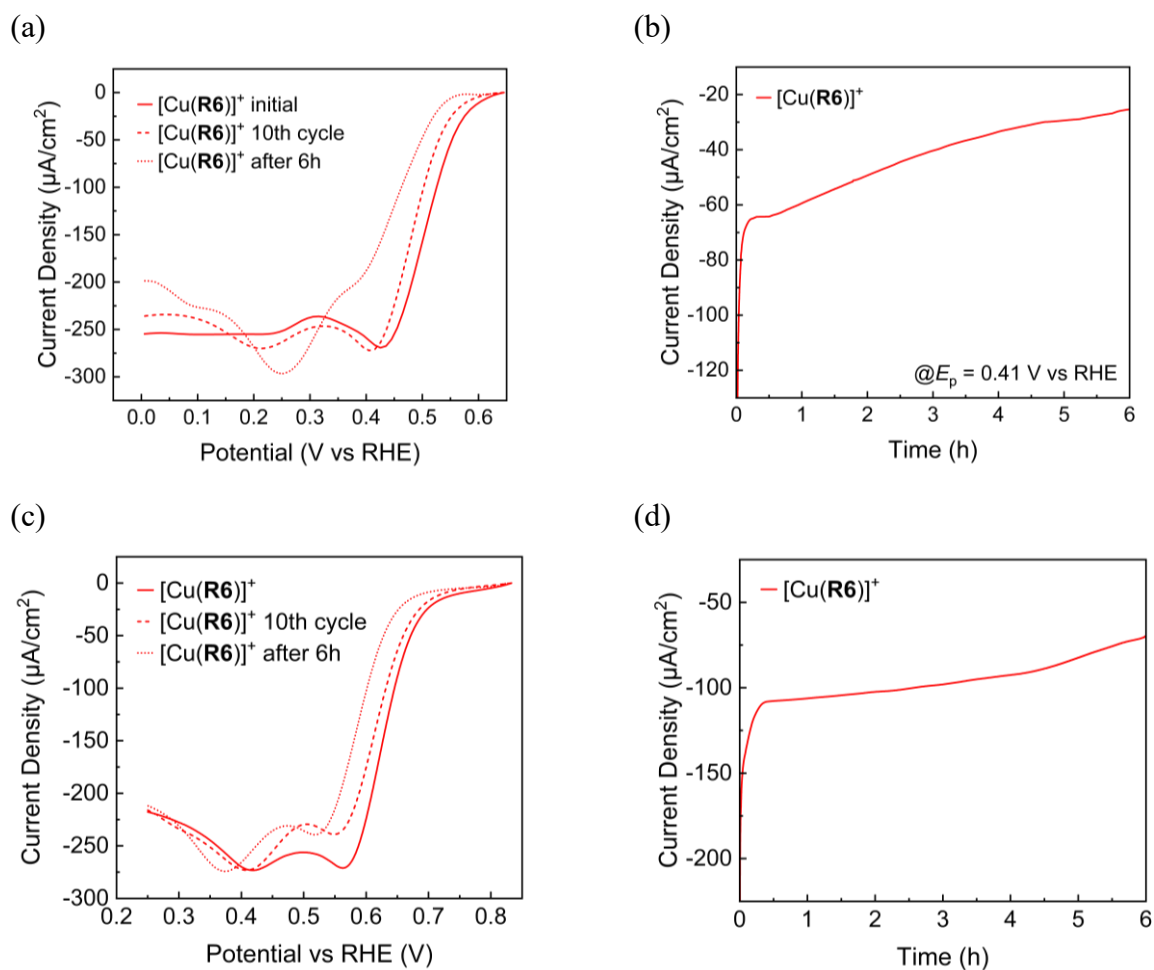

**Fig. S40.** Linear sweep voltammograms (LSV) of  $[\text{Cu}(\text{R6})]^+$  at the initial stage (solid red), at 10<sup>th</sup> consecutive LSV scan (dashed red), and after 6 hours of chronoamperometry test (dotted red). Chronoamperometry curve of  $[\text{Cu}(\text{R6})]^+$  recorded over 6 hours at  $E_p$ . Data in (a) and (b) were collected in pH 4 BR buffer, while data in (c) and (d) were recorded in pH 7 BR buffer.

(a)

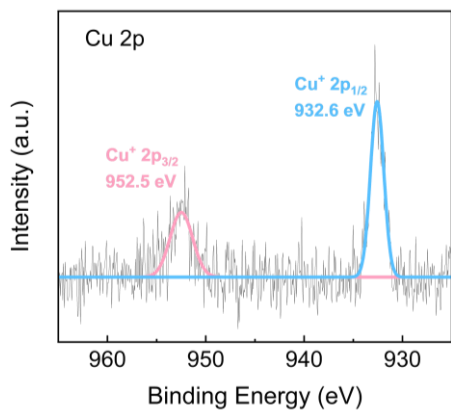

(b)

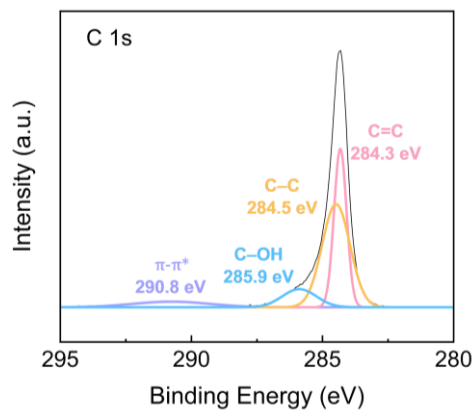

(c)

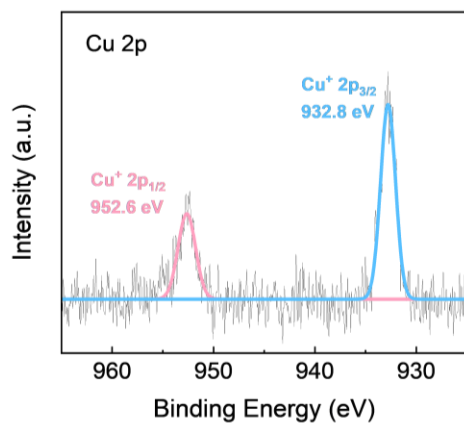

(d)

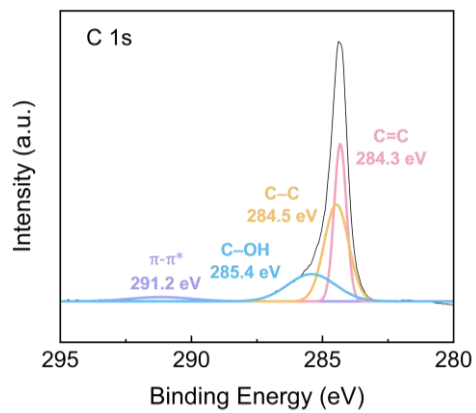

(e)

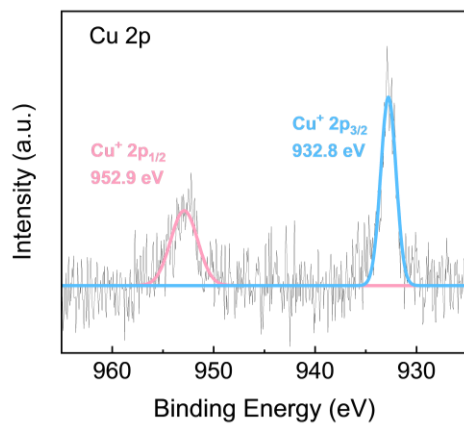

(f)

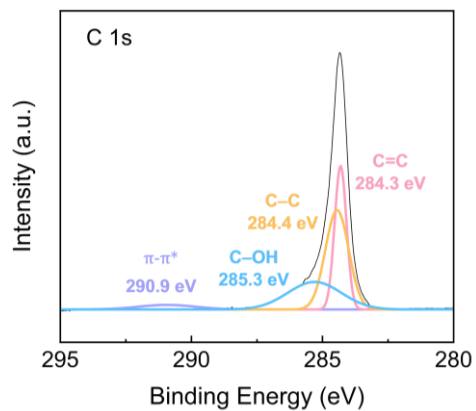

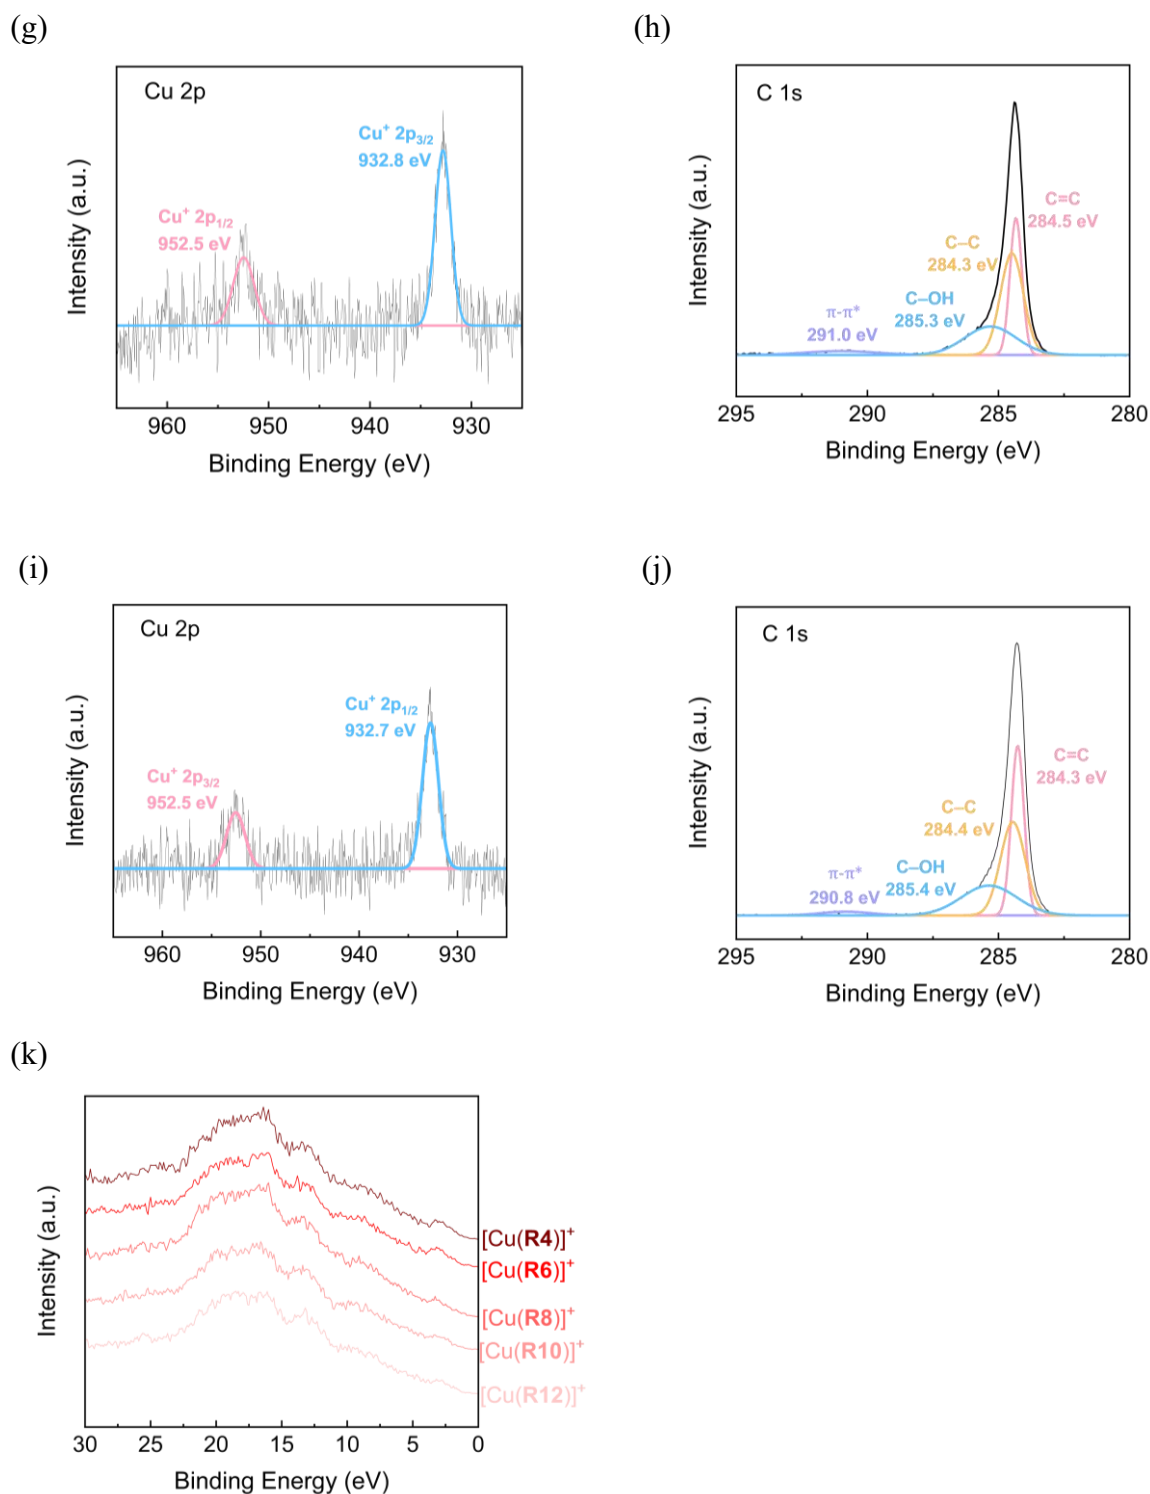

**Fig. S41.** High-resolution X-ray photoelectron (XPS) spectra of Cu 2p, C 1s, and (k) valence band for (a,b) [Cu(R4)]<sup>+</sup>, (c,d) [Cu(R6)]<sup>+</sup>, (e,f) [Cu(R8)]<sup>+</sup>, (g,h) [Cu(R10)]<sup>+</sup>, and (i,j) [Cu(R12)]<sup>+</sup> before ORR.

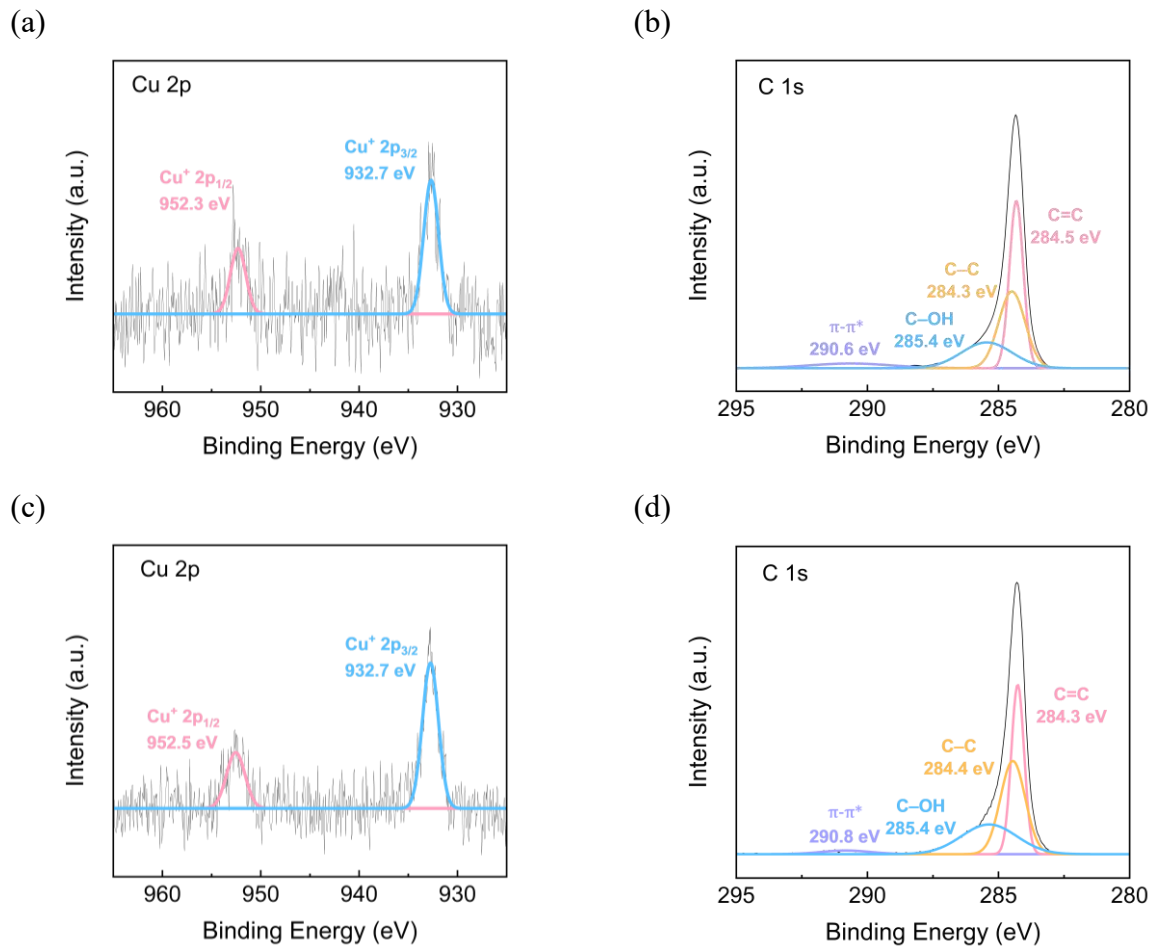

**Fig. S42.** High-resolution XPS spectra of Cu 2p and C 1s for  $[\text{Cu}(\mathbf{R6})]^+$  after 10 consecutive ORR LSV scans (a,b) at pH 4 and (c, d) at pH 7.

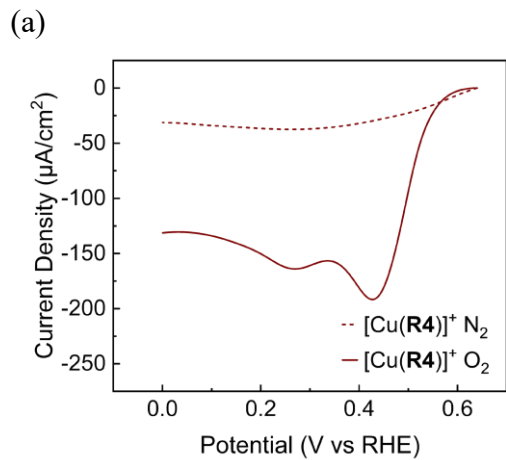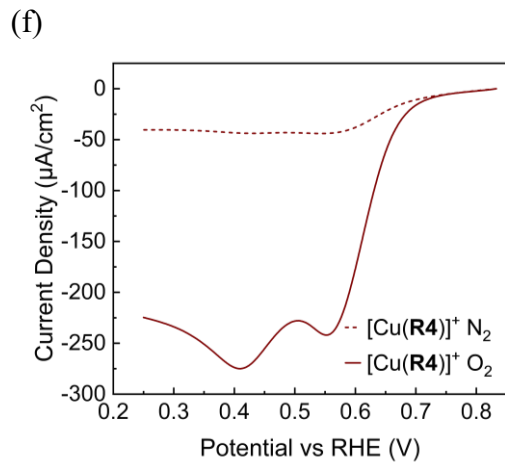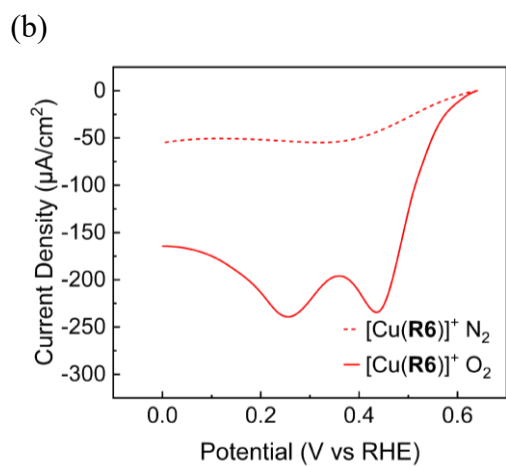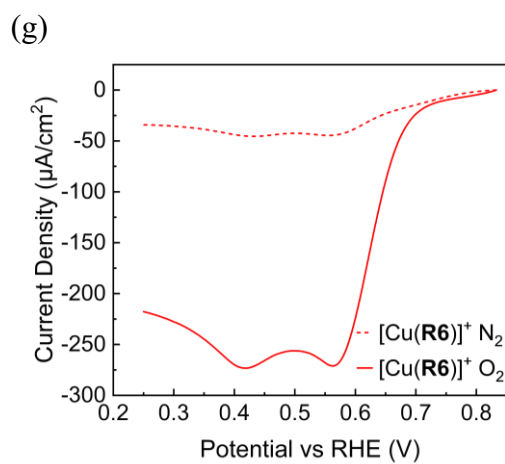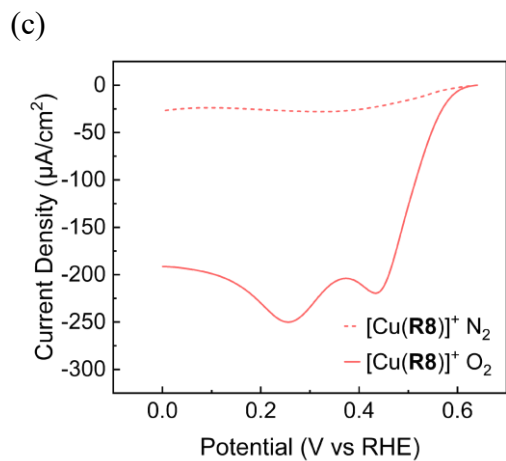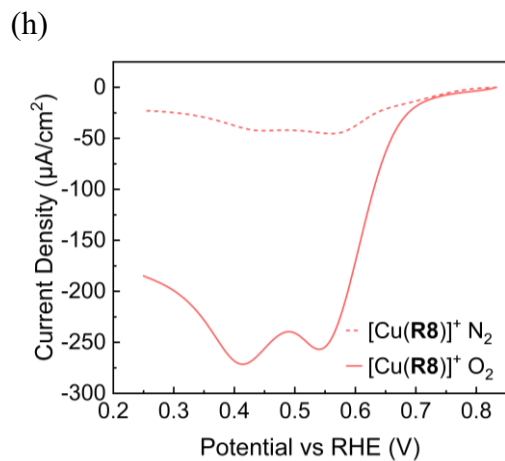

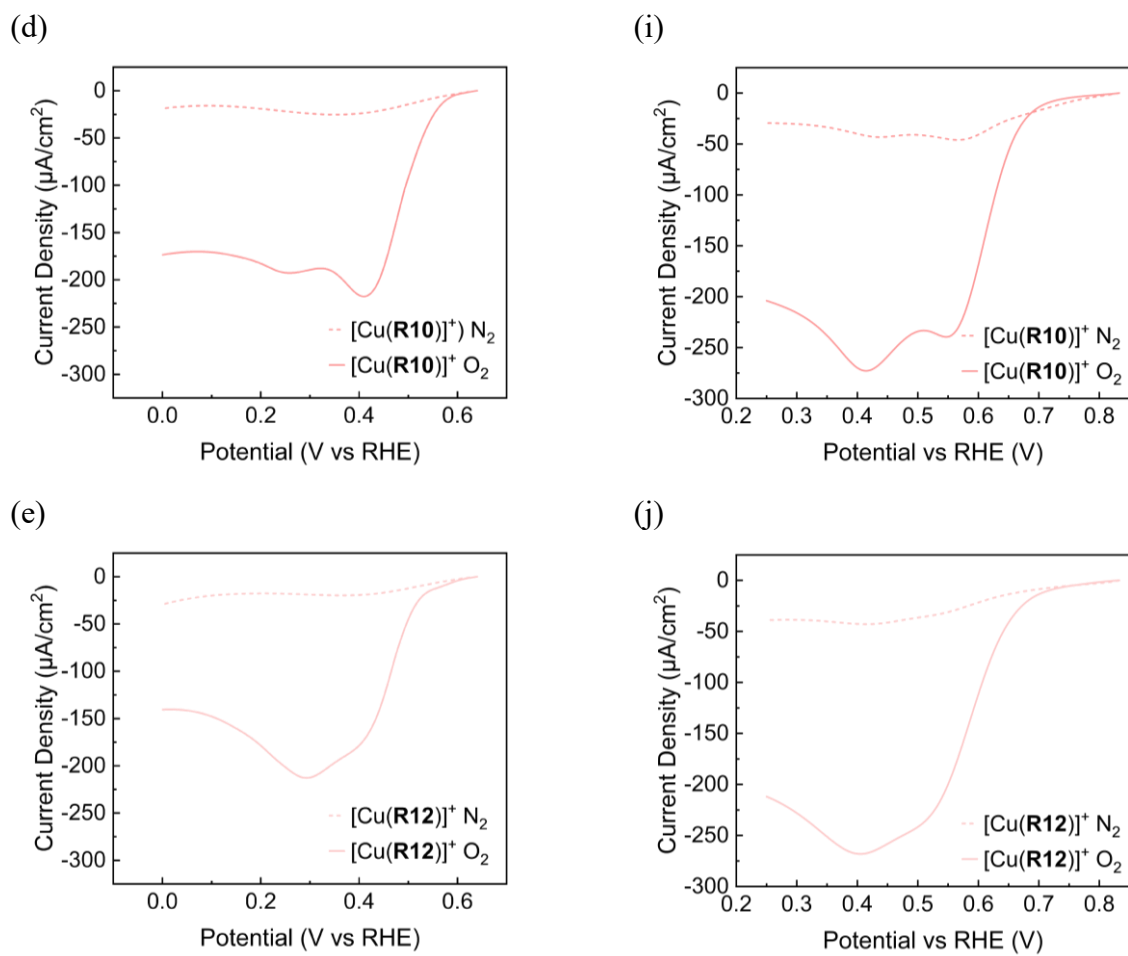

**Fig. S43.** Cyclic voltammograms of all Cu<sup>I</sup> rotaxane complexes under N<sub>2</sub>-saturated (dotted) and O<sub>2</sub>-saturated (solid) electrolytes in BR buffers at (a-e) pH 4 and (f-j) pH 7.

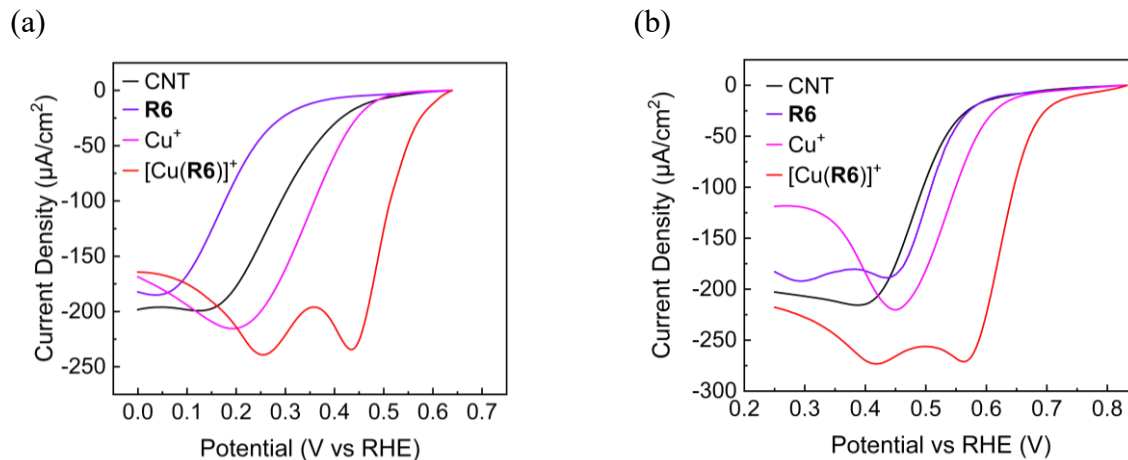

**Fig. S44.** Linear sweep voltammograms of ORR catalysed by heterogenous **R6** and  $[\text{Cu}(\text{R6})]^+$  supported on carbon nanotubes (CNT), homogenous  $\text{Cu}^+$  ions (2 mM  $[\text{Cu}(\text{MeCN})_4](\text{PF}_6)$ ), and CNT only in BR buffer at (a) pH 4 and (b) pH 7.

## Supporting References

1. J. D. Crowley, K. D. Hänni, A.-L. Lee and D. A. Leigh, *J. Am. Chem. Soc.*, 2007, **129**, 12092–12093.
2. J. E. M. Lewis, R. J. Bordoli, M. Denis, C. J. Fletcher, M. Galli, E. A. Neal, E. M. Rochette and S. M. Goldup, *Chem. Sci.*, 2016, **7**, 3154–3161.
3. A. Al Abbas, B. Heinrich, M. L'Her, E. Couzigné, R. Welter and L. Douce, *New J. Chem.*, 2017, **41**, 2604–2613.
4. O. V. Dolomanov, L. J. Bourhis, R. J. Gildea, J. A. K. Howard and H. Puschmann, *J. Appl. Cryst.*, 2009, **42**, 339–341.
5. M. A. Thorseth, C. S. Letko, E. C. M. Tse, T. B. Rauchfuss and A. A. Gewirth, *Inorg. Chem.*, 2013, **52**, 628–634.
6. X. Mo, Y. Deng, S. K.-M. Lai, X. Gao, H.-L. Yu, K.-H. Low, Z. Guo, H.-L. Wu, H. Y. Au-Yeung and E. C. M. Tse, *J. Am. Chem. Soc.*, 2023, **145**, 6087–6099.
7. Z. Lu, G. Chen, S. Siahrostami, Z. Chen, K. Liu, J. Xie, L. Liao, T. Wu, D. Lin, Y. Liu, T. F. Jaramillo, J. K. Nørskov and Y. Cui, *Nat. Catal.*, 2018, **1**, 156–162.
8. W. Zhou, X. Mo, C. W. Cheung and E. C. M. Tse, *J. Chem. Eng.*, 2024, **500**, 157129.
9. E. C. M. Tse, C. J. Barile, N. A. Kirchschrager, Y. Li, J. P. Gewargis, S. C. Zimmerman, A. Hosseini and A. A. Gewirth, *Nat. Mater.*, 2016, **15**, 754–759.
10. T. Zeng, J. Chen, Z. H. Yu and E. C. M. Tse, *J. Am. Chem. Soc.*, 2024, **146**, 31757–31767.
11. D. Brazzolotto, Y. Nedellec, C. Philouze, M. Holzinger, F. Thomas and A. Le Goff, *Inorg. Chem.*, 2022, **61**, 14997–15006.
12. R. Venegas, K. Muñoz-Becerra, L. Lemus, A. Toro-Labbé, J. H. Zagal and F. J. Recio, *J. Phys. Chem. C*, 2019, **123**, 19468–19478.
13. S. Gentil, D. Serre, C. Philouze, M. Holzinger, F. Thomas and A. Le Goff, *Angew. Chem. Int. Ed. Engl.*, 2016, **55**, 2517–2520.

14. B. van Dijk, J. P. Hofmann and D. G. H. Hetterscheid, *Phys. Chem. Chem. Phys.*, 2018, **20**, 19625–19634.
15. C. C. McCrory, X. Ottenwaelder, T. D. Stack and C. E. Chidsey, *J. Phys. Chem. A*, 2007, **111**, 12641–12650.
16. M. A. Thorseth, C. E. Tornow, E. C. M. Tse and A. A. Gewirth, *Coord. Chem. Rev.*, 2013, **257**, 130–139.
17. S. Gentil, J. K. Molloy, M. Carrière, A. Hobballah, A. Dutta, S. Cosnier, W. J. Shaw, G. Gellon, C. Belle, V. Artero, F. Thomas and A. Le Goff, *Joule*, 2019, **3**, 2020–2029.
18. C. C. L. McCrory, A. Devadoss, X. Ottenwaelder, R. D. Lowe, T. D. P. Stack and C. E. D. Chidsey, *J. Am. Chem. Soc.*, 2011, **133**, 3696–3699.
19. V. L. N. Dias, E. N. Fernandes, L. M. S. da Silva, E. P. Marques, J. Zhang and A. L. B. Marques, *J. Power Sources*, 2005, **142**, 10–17.
20. Y. Lei and F. C. Anson, *Inorg. Chem.*, 1994, **33**, 5003–5009.
21. Q.-k. Zhuang and F. Scholz, *J. Porphyr. Phthalocyanines*, 2000, **4**, 202–208.
22. J. Zhang and F. C. Anson, *J. Electroanal. Chem.*, 1992, **341**, 323–341.
23. C. J. M. van der Ham, D. N. H. Zwagerman, L. Wu, J. P. Hofmann and D. G. H. Hetterscheid, *ChemElectroChem*, 2022, **9**, e202101365.
24. S.-J. Liu, C.-H. Huang and C.-C. Chang, *Mater. Chem. Phys.*, 2003, **82**, 551–556.
25. T. Gurusamy, P. Gayathri, S. Mandal and K. Ramanujam, *ChemElectroChem*, 2018, **5**, 1837–1847.
26. N. Tanjedrew, K. Thammanatpong, P. Surawatanawong, P. Chakthranont, T. Chantarojsiri, P. Sangtrirutnugul, K. Schwedtmann, K. Schwedtmann, J. J. Weigand and S. Kiatisevi, *ChemCatChem*, 2025, **17**, e01081.
27. C. X. Cai, K. H. Xue, X. Y. Xu and Q. H. Luo, *J. Appl. Electrochem.*, 1997, **27**, 793–798.
28. M. Wang, X. Xu, J. Gao, N. Jia and Y. Cheng, *Russ. J. Electrochem.*, 2006, **42**, 878–881.

29. N. C. Bhoumik, C. K. Locke, P. Mondol, Y. Yang and C. J. Barile, *ACS Appl. Energy Mater.*, 2025, **8**, 8130–8138.
30. S. N. Chowdhury, S. Biswas, P. Das, S. Paul and A. N. Biswas, *Inorg. Chem.*, 2020, **59**, 14012–14022.
31. L. Jin, S. Thanneeru, D. Cintron and J. He, *ChemCatChem*, 2020, **12**, 5932–5937.
32. N. W. G. Smits, B. van Dijk, I. de Bruin, S. L. T. Groeneveld, M. A. Siegler and D. G. H. Hetterscheid, *Inorg. Chem.*, 2020, **59**, 16398–16409.
33. X. Zhang, G.-S. Chen, H.-C. Liu, M.-J. Zhu, M.-Y. Xie, M.-S. Cen, Q.-J. Li, T.-S. Wang and H.-X. Zhang, *Electrochim. Acta*, 2023, **446**, 142099.
34. X. Zhang, X.-Q. Sun, J.-C. Liu, Y.-L. Pu, Q.-R. Ou-Yang, D.-Y. Lu and H.-X. Zhang, *Electrochim. Acta*, 2024, **477**, 143758.
